# Supplementary material for: Effects of non covalent interactions in light emitting properties of bis-pyridyl-alkyl-di-imines
Source: Royal Society of Chemistry journal article supplement (doi:10.1039/c5ra09562j), 2015-01-01
Supplement: c5ra09562j1.pdf [file c5ra09562j1.pdf]

Effects of Non Covalent Interactions in Light Emitting Properties of *bis*-pyridyl-alkyl-*di*-imines

Fayaz Baig,<sup>a</sup> Rajni Kant,<sup>b</sup> Vivek K. Gupta<sup>b</sup> and Madhushree Sarkar<sup>\*a</sup>

<sup>a</sup> Department of Chemistry, Birla Institute of Technology and Science, Pilani, Pilani Campus, Rajasthan, India. Fax: +91-1596-244183; Tel: +91-1596-515679; E-mail: msarkar@pilani.bits-pilani.ac.in

<sup>b</sup> Post Graduate Department of Physics, University of Jammu, Jammu Tawi, India. Fax/Tel: +91-191-2432051 E-mail: rkvk.paper11@gmail.com

## General

Infra-red spectrum was recorded in FTIR ABB Bomen MB-3000. UV-Vis absorption spectra were recorded in Shimadzu Spectrophotometer with model UV-2450. Fluorescence spectra were recorded in Shimadzu Spectrofluorophotometer with model RF-5301PC. <sup>1</sup>H and <sup>13</sup>C nuclear magnetic resonance spectra were measured on a 400 MHz NMR spectrometer (Bruker).

**Figure S1: IR Spectra of (L1a):**

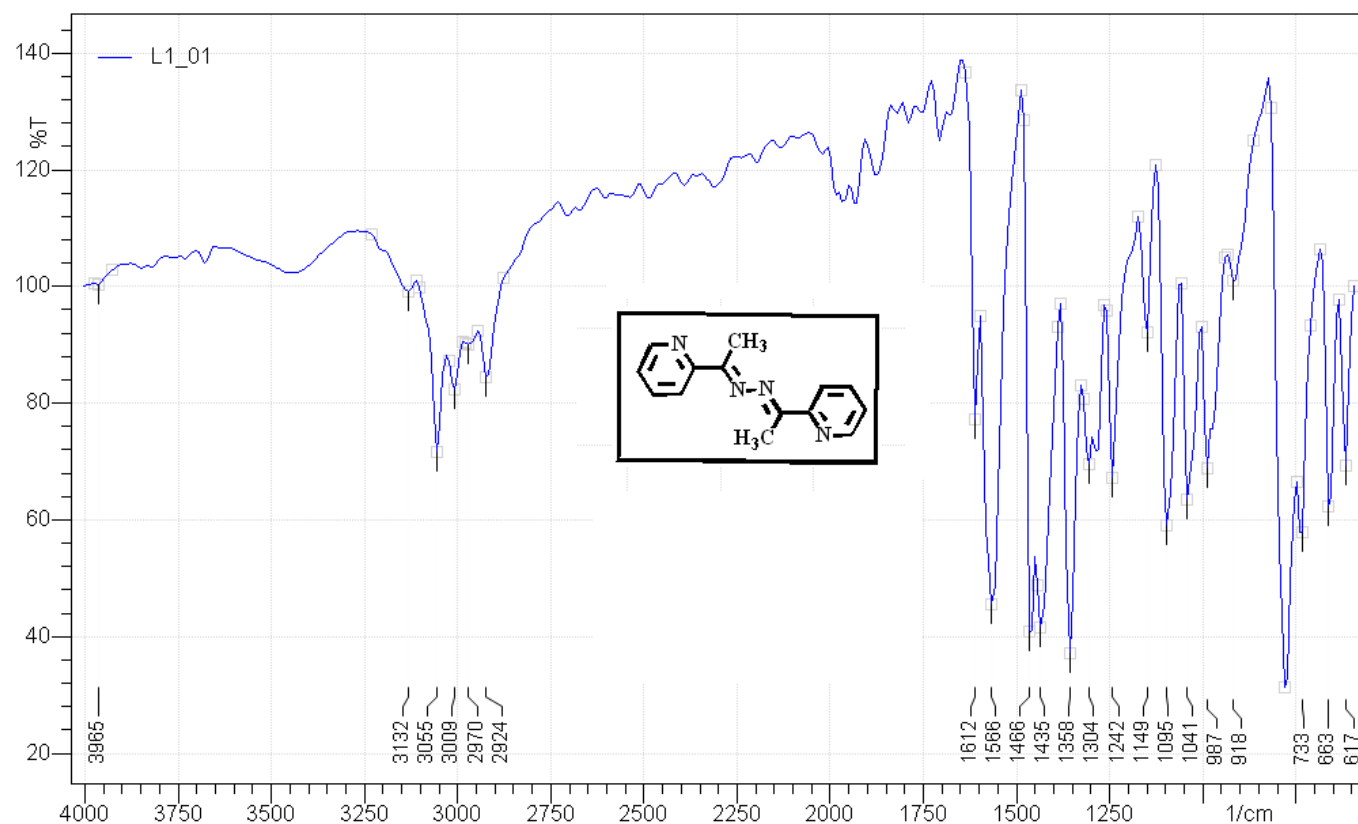

**IR: 3055(s), 3009(w), 2924(w), 1612(s), 1566(vs), 1466(vs), 1435(vs), 1358(vs), 1304(s), 1242(s), 1149(w), 1095(s), 1041(s), 987(s), 779(vs), 733(s), 663(s), 617(s).**

Figure S2:  $^1\text{H}$  NMR Spectra of L1a:

### $^1\text{H}$ NMR Spectra of L1a

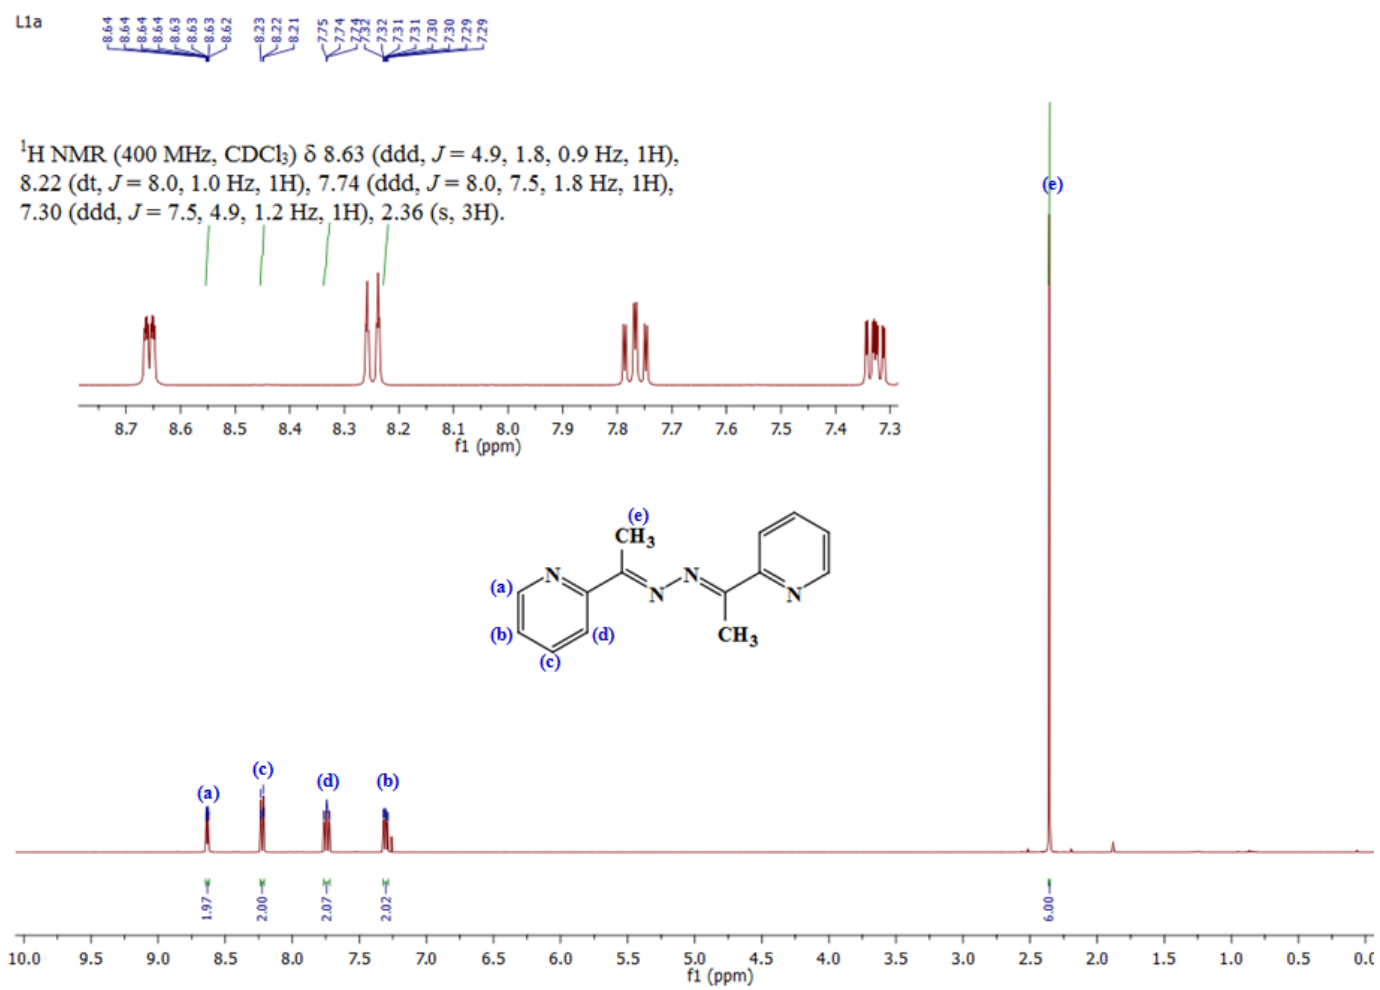

Figure S3:  $^{13}\text{C}$  NMR Spectra of L1a:

### $^{13}\text{C}$ NMR Spectra of L1a

L1a

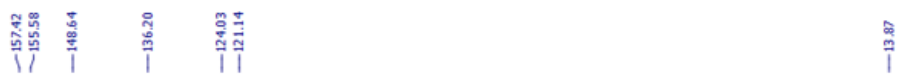

$^{13}\text{C}$  NMR (101 MHz,  $\text{CDCl}_3$ )  $\delta$  157.42 (s), 155.58 (s), 148.64 (s), 136.20 (s), 124.03 (s), 121.14 (s), 13.87 (s).

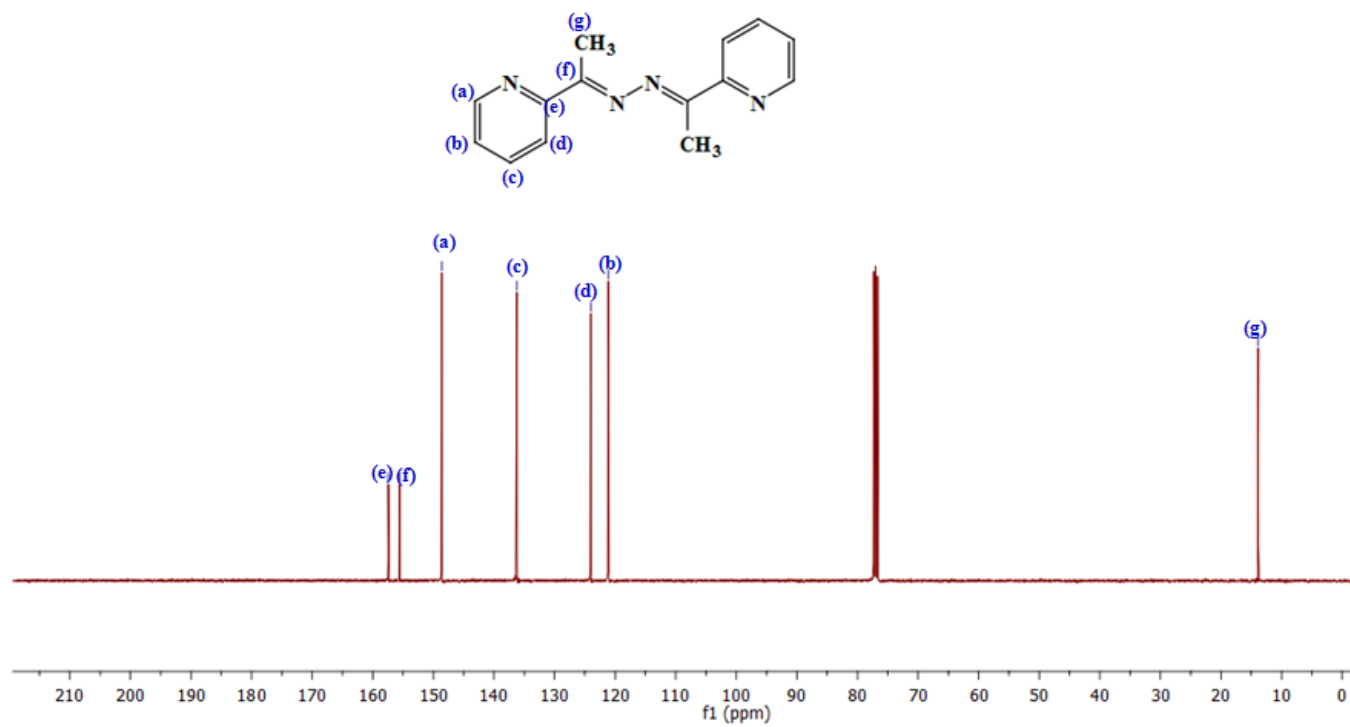

**Figure S4: Elemental Analysis of L1a**

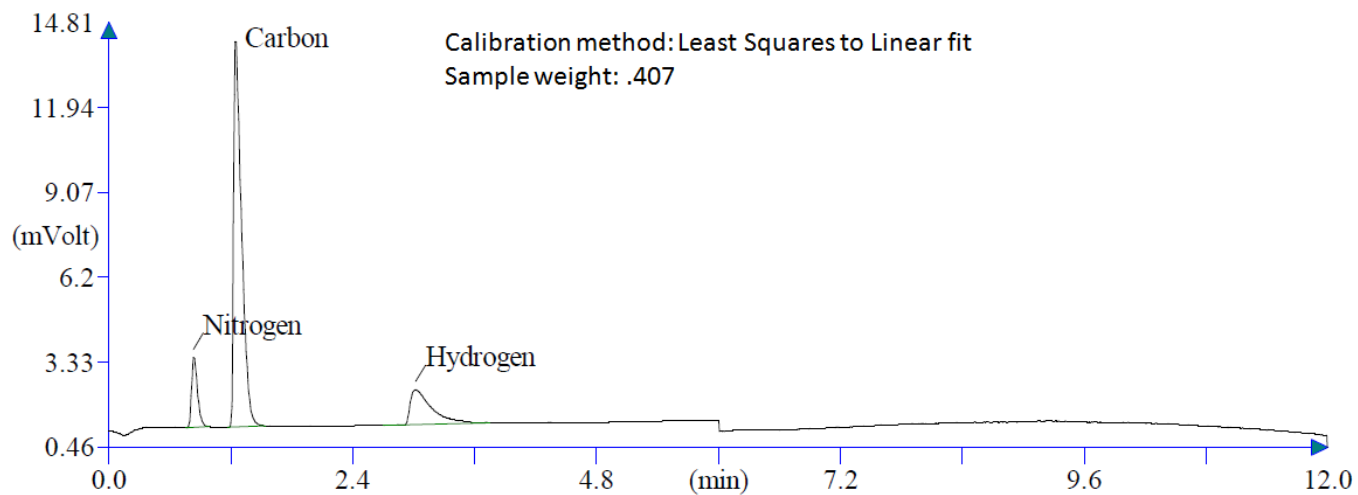

| Retention Time (min) | Component Name | Element % |
|----------------------|----------------|-----------|
| 0.833                | Nitrogen       | 23.48     |
| 1.242                | Carbon         | 70.63     |
| 3.017                | Hydrogen       | 5.89      |

**Calculated :**

Chemical Formula:  $C_{14}H_{14}N_4$

Molecular Weight: 238.29

Elemental Analysis: C, 70.57; H, 5.92; N, 23.51

**Figure S5: IR Spectra of L1b:**

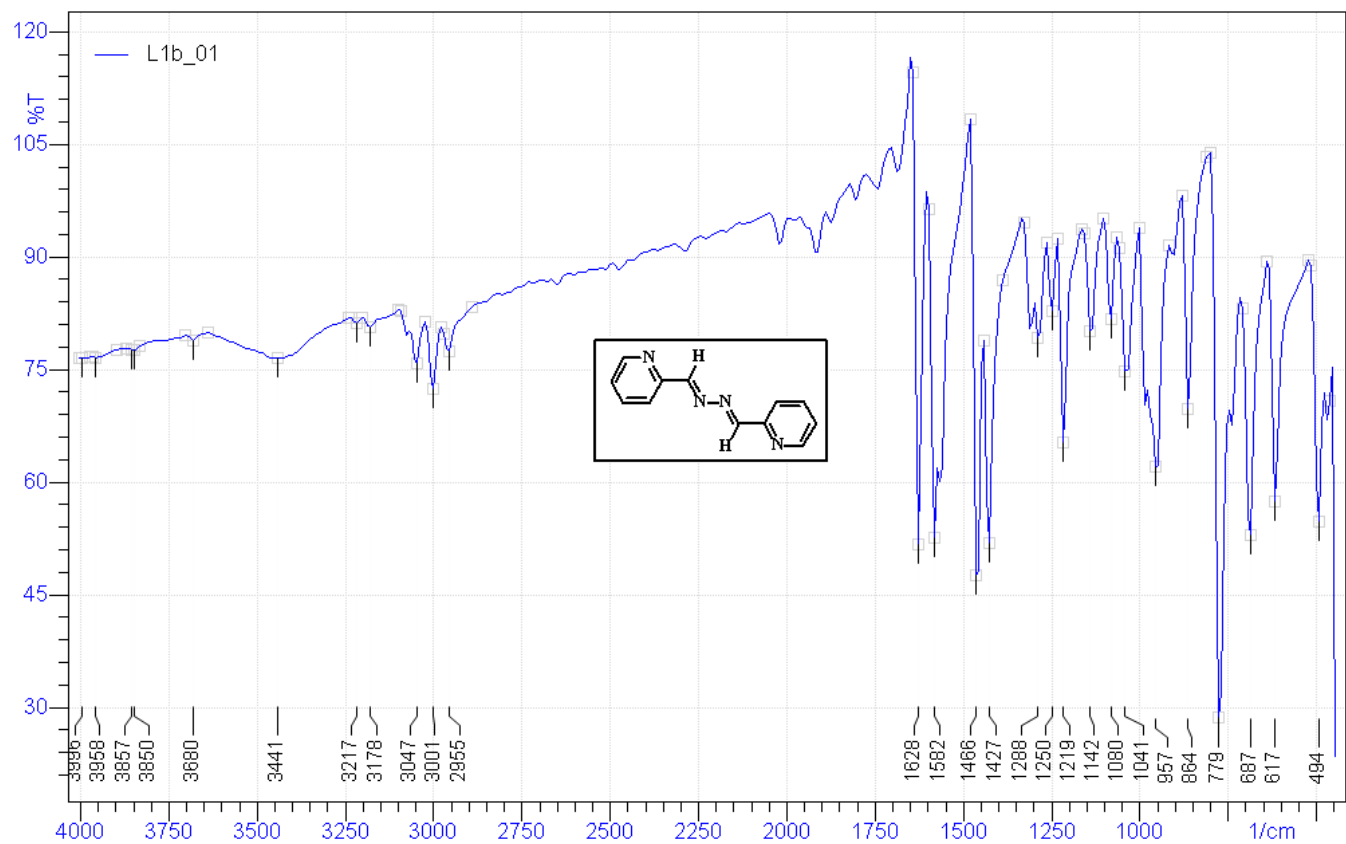

**IR: 3047(w), 3001(w), 2955(w), 1628(vs), 1582(vs), 1466(vs), 1427(vs), 1288(w), 1250(w), 1219(s), 1142(w), 1080(w), 957(s), 864(s), 779(vs), 687(vs), 617(vs), 494(vs)**

Figure S6:  $^1\text{H}$  NMR Spectra of L1b:

### $^1\text{H}$ NMR Spectra of L1b

L1b

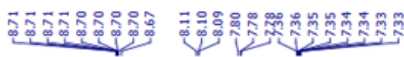

$^1\text{H}$  NMR (400 MHz,  $\text{CDCl}_3$ )  $\delta$  8.70 (ddd,  $J = 4.8, 1.7, 0.9$  Hz, 1H), 8.67 (s, 1H), 8.10 (dt,  $J = 7.9, 1.0$  Hz, 1H), 7.78 (td,  $J = 7.7, 1.6$  Hz, 1H), 7.34 (ddd,  $J = 7.5, 4.8, 1.2$  Hz, 1H).

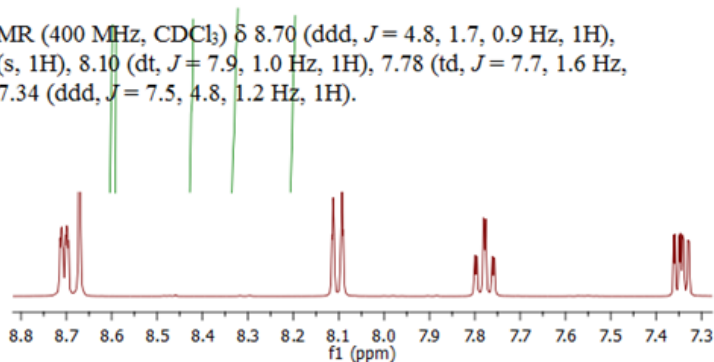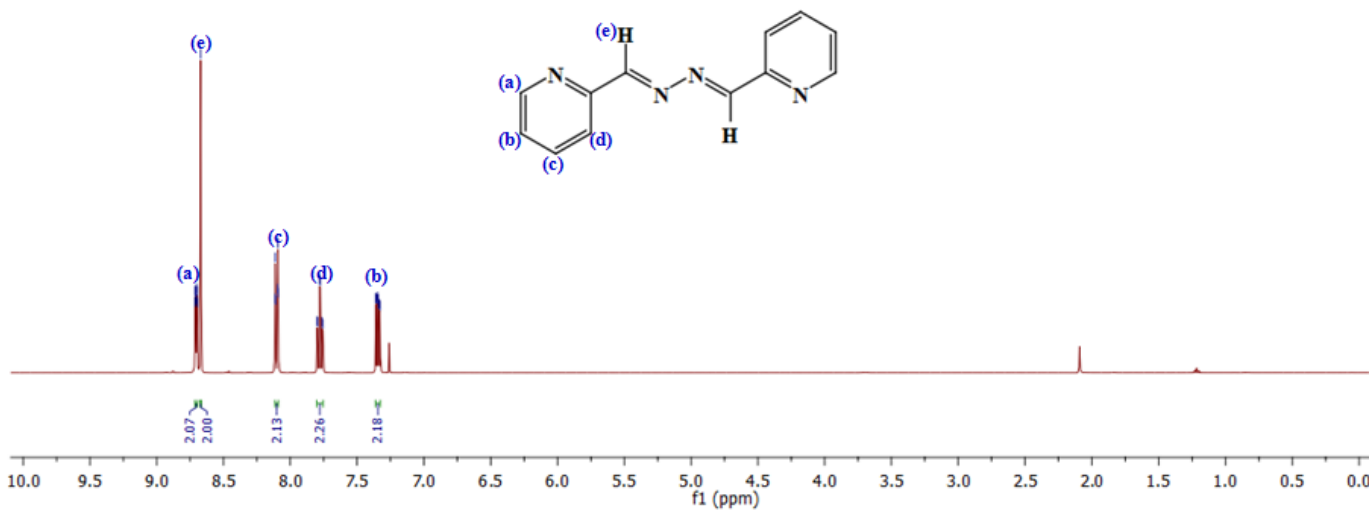

Figure S7:  $^{13}\text{C}$  NMR Spectra of L1b:

### $^{13}\text{C}$ NMR Spectra of L1b

L1b

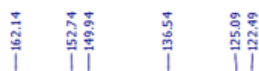

$^{13}\text{C}$  NMR (101 MHz,  $\text{CDCl}_3$ )  $\delta$  162.14 (s), 152.74 (s), 149.94 (s), 136.54 (s), 125.09 (s), 122.49 (s).

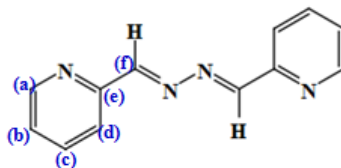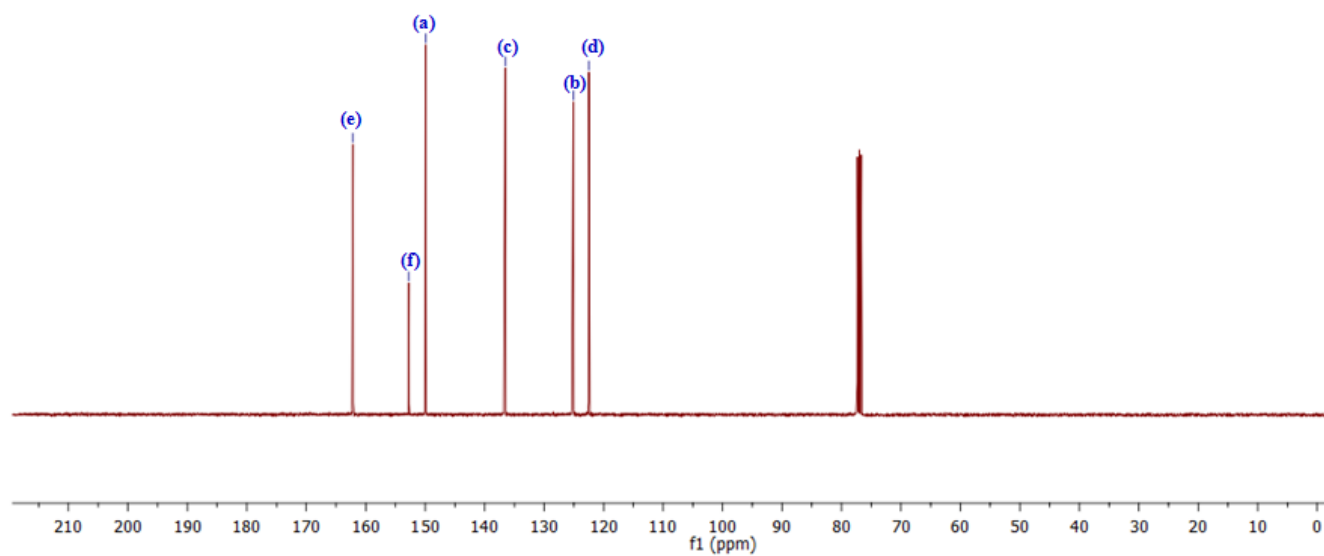

**Figure S8: Elemental Analysis of L1b:**

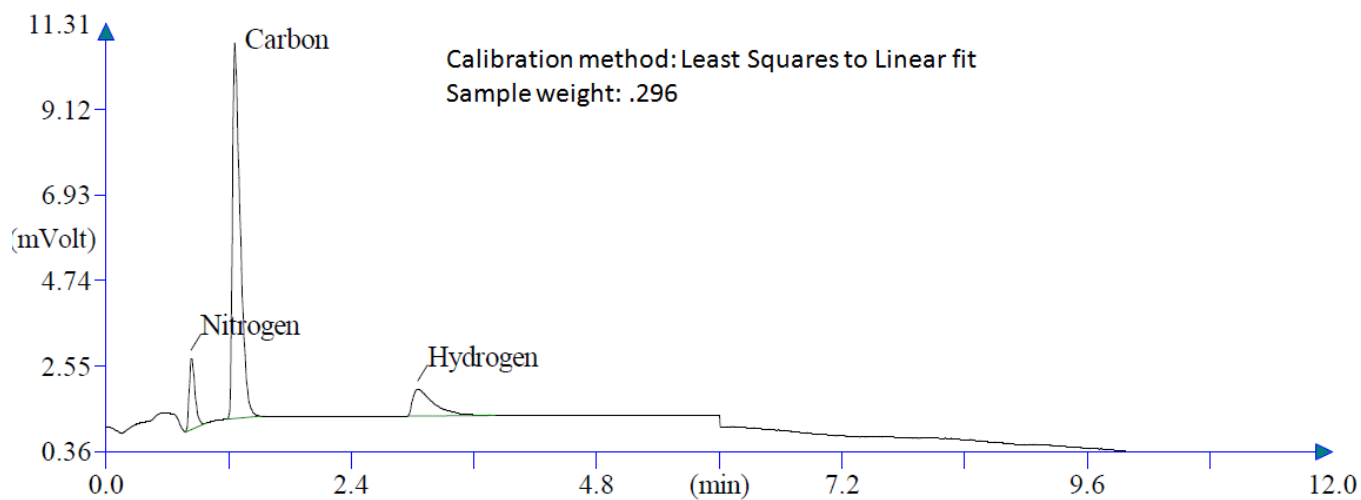

| Retention Time (min) | Component Name | Element % |
|----------------------|----------------|-----------|
| 0.833                | Nitrogen       | 26.61     |
| 1.258                | Carbon         | 68.64     |
| 3.050                | Hydrogen       | 4.75      |

**Calculated:**

Chemical Formula:  $C_{12}H_{10}N_4$   
Molecular Weight: 210.23  
Elemental Analysis: C, 68.56; H, 4.79; N, 26.65



**Figure S9: IR Spectra of L2a:**

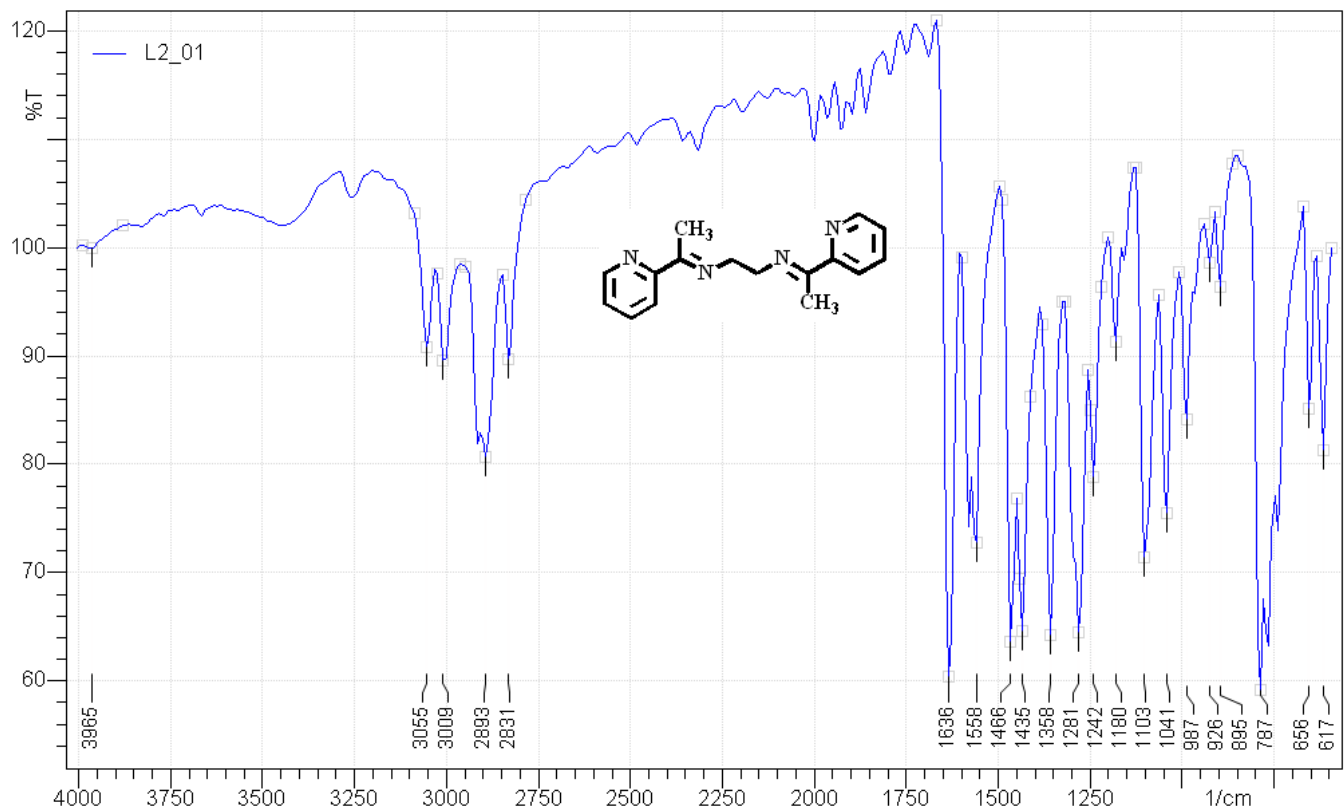

**IR: 3055(s), 3009(s), 2893(s), 2831(s), 1636(vs), 1558(vs), 1466(vs), 1435(vs), 1358(vs), 1281(vs), 1242(s), 1180(w), 1103(vs), 1041(vs), 987(s), 926(w), 859(w), 787((vs), 656(s), 617(s).**

Figure S10:  $^1\text{H}$  NMR Spectra of L2a:

### $^1\text{H}$ NMR Spectra of L2a

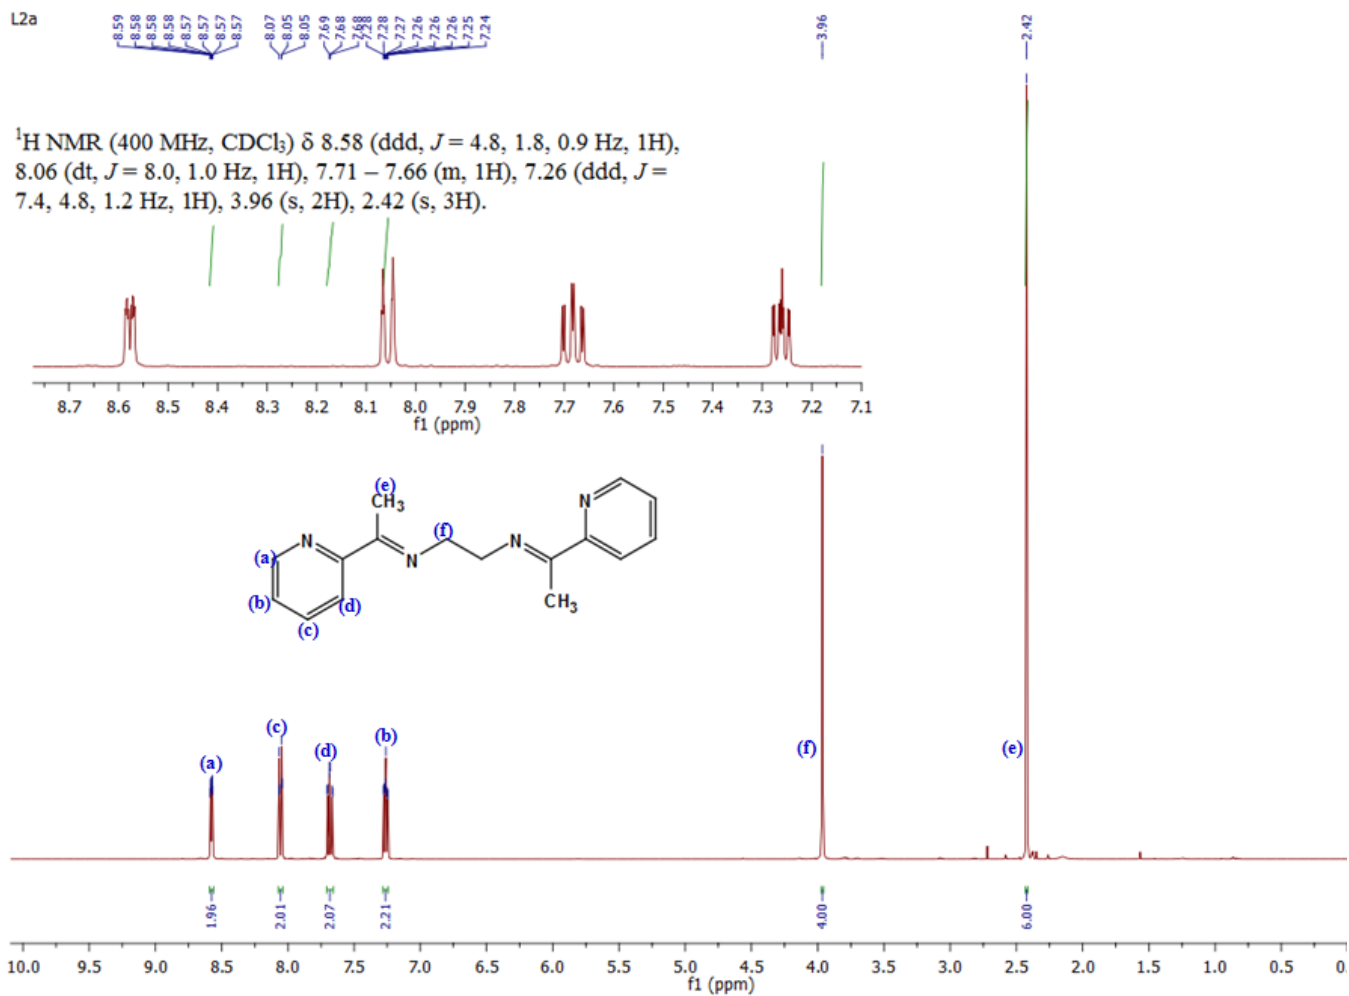

Figure S11:  $^{13}\text{C}$  NMR Spectra of L2a:

### $^{13}\text{C}$ NMR Spectra of L2a

L2a

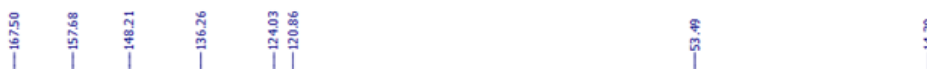

$^{13}\text{C}$  NMR (101 MHz,  $\text{CDCl}_3$ )  $\delta$  167.50 (s), 157.68 (s), 148.21 (s), 136.26 (s), 124.03 (s), 120.86 (s), 53.49 (s), 14.39 (s).

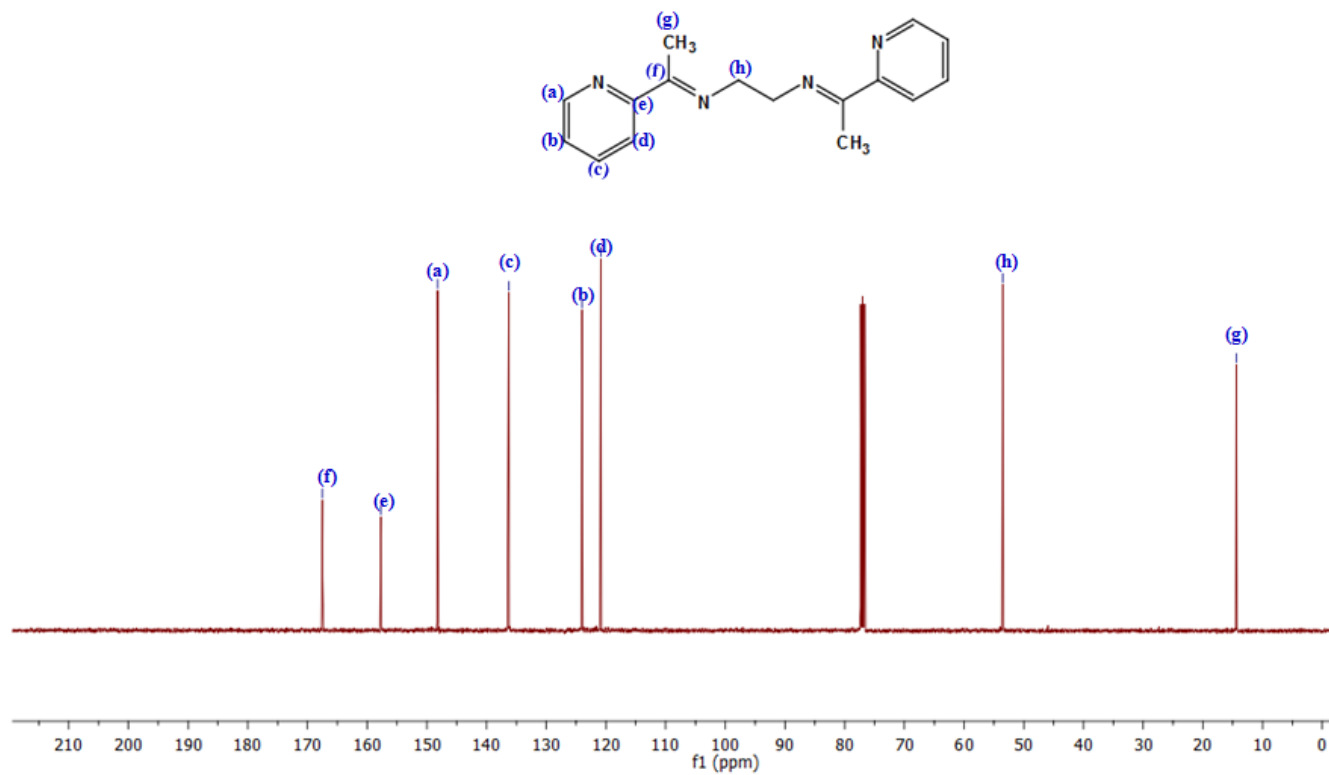

**Figure S12: Elemental Analysis of L2a:**

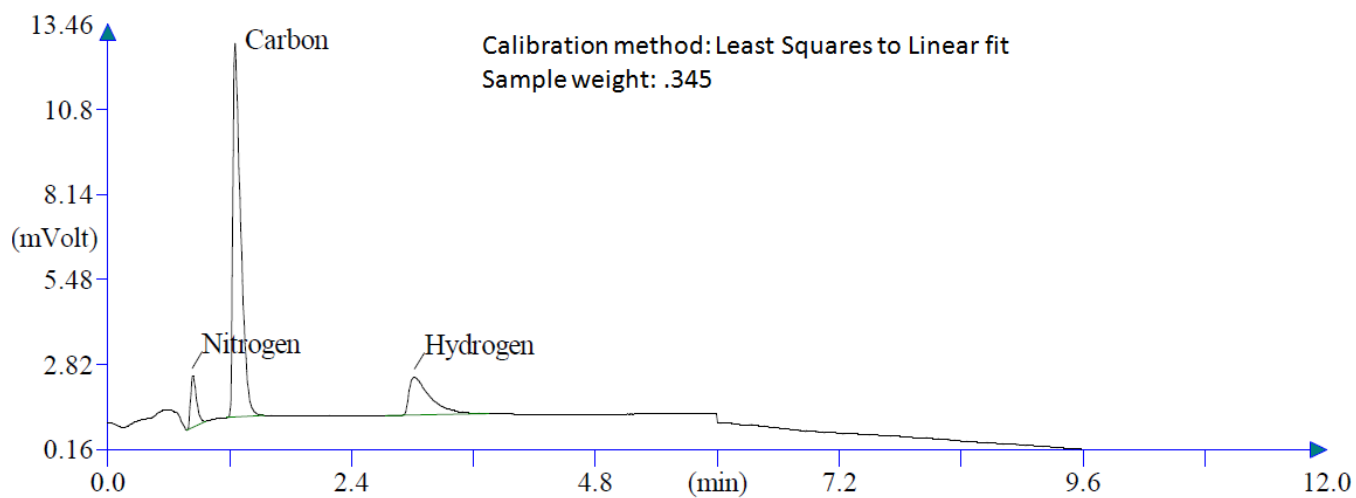

| Retention Time (min) | Component Name | Element % |
|----------------------|----------------|-----------|
| 0.833                | Nitrogen       | 20.98     |
| 1.250                | Carbon         | 72.23     |
| 3.017                | Hydrogen       | 6.79      |

**Calculated:**

Chemical Formula:  $C_{16}H_{18}N_4$   
Molecular Weight: 266.34  
Elemental Analysis: C, 72.15; H, 6.81; N, 21.04

**Figure S13: IR Spectra of L2b:**

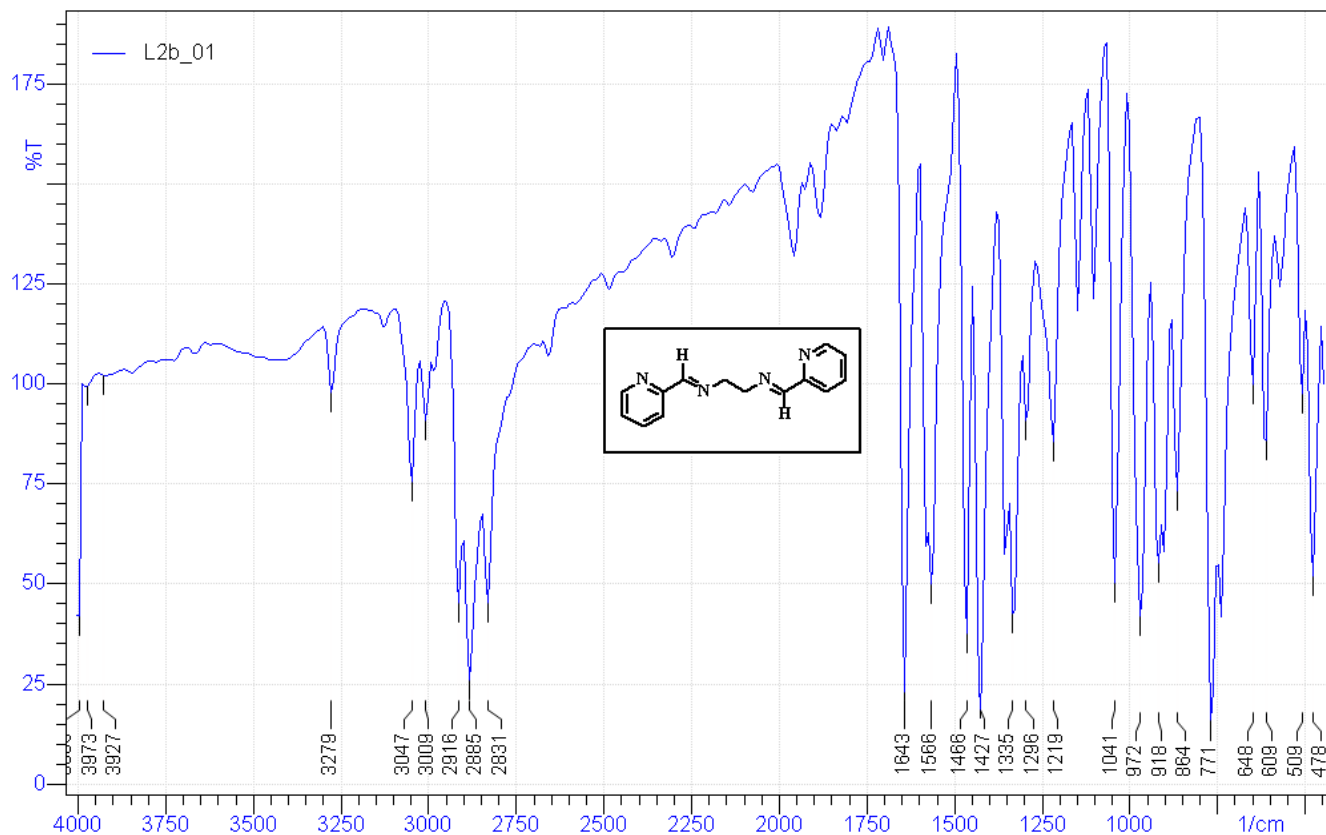

**IR( $\text{cm}^{-1}$  KBr pellet): 3047(s), 3009(w), 2916(s), 2885(vs), 2831(s), 1643(vs), 1566(vs), 1466(vs), 1427(vs), 1335(vs), 1296(s), 1219(s), 1041(vs), 972(vs), 918(vs), 864(vs), 771(vs).**

Figure S14:  $^1\text{H}$  NMR Spectra of L2b:

### $^1\text{H}$ NMR Spectra of L2b

L2b

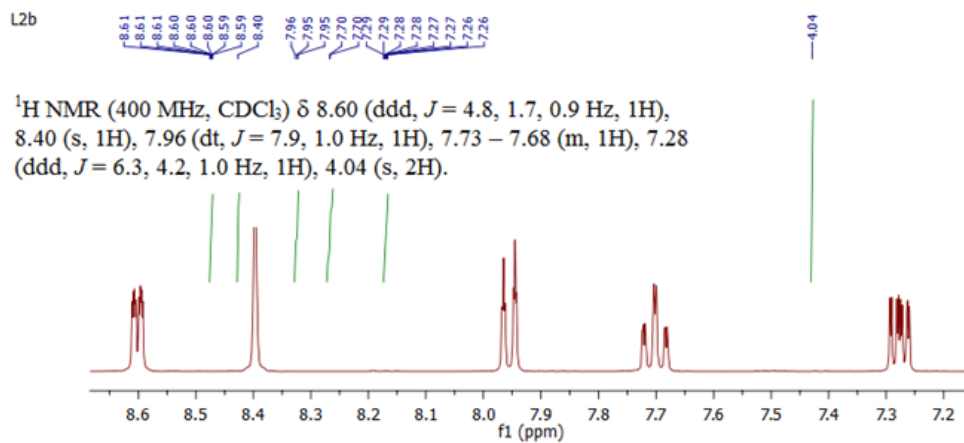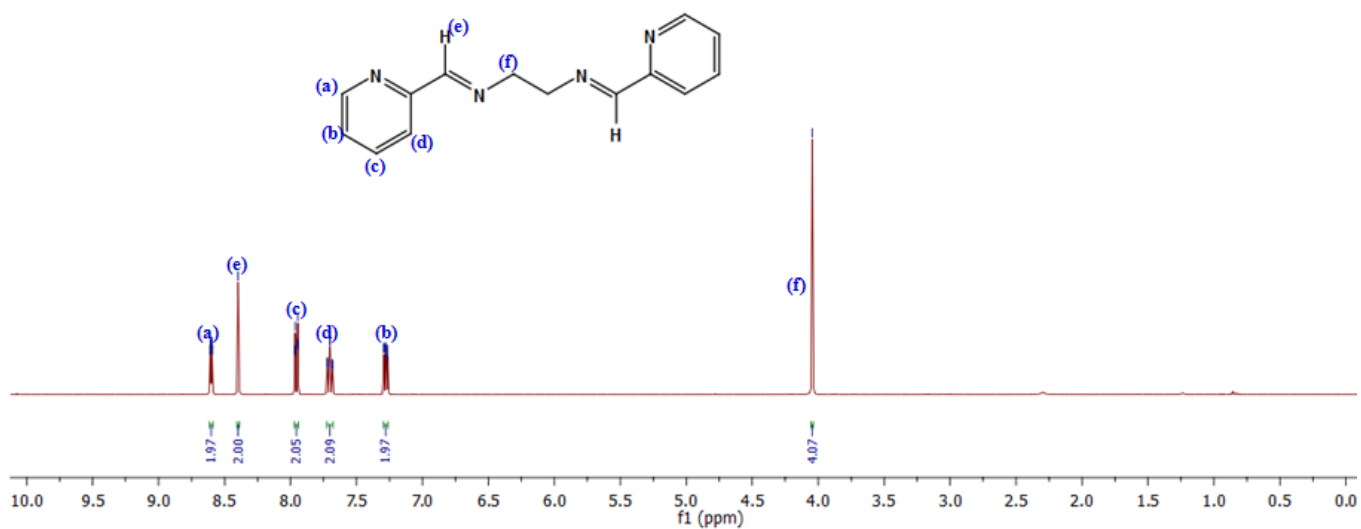

Figure S15:  $^{13}\text{C}$  NMR Spectra of L2b:

### $^{13}\text{C}$ NMR Spectra of L2b

L2b

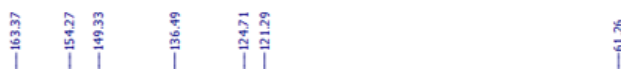

$^{13}\text{C}$  NMR (101 MHz,  $\text{CDCl}_3$ )  $\delta$  163.37 (s), 154.27 (s), 149.33 (s), 136.49 (s), 124.71 (s), 121.29 (s), 61.26 (s).

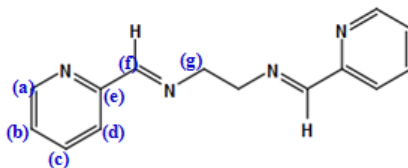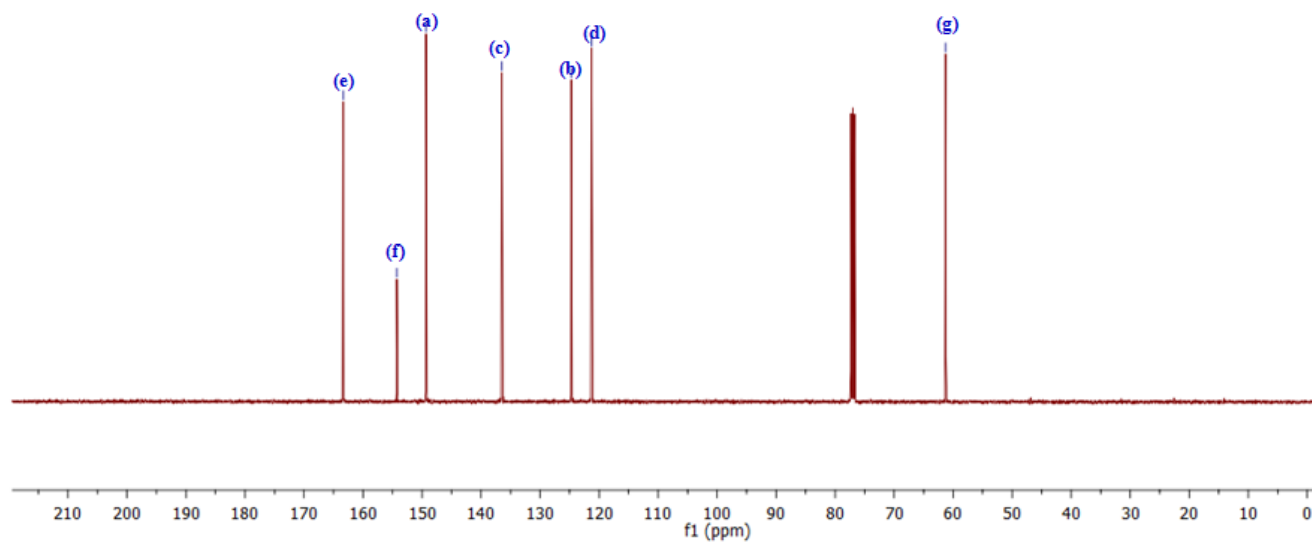

**Figure S16: Elemental Analysis of L2b:**

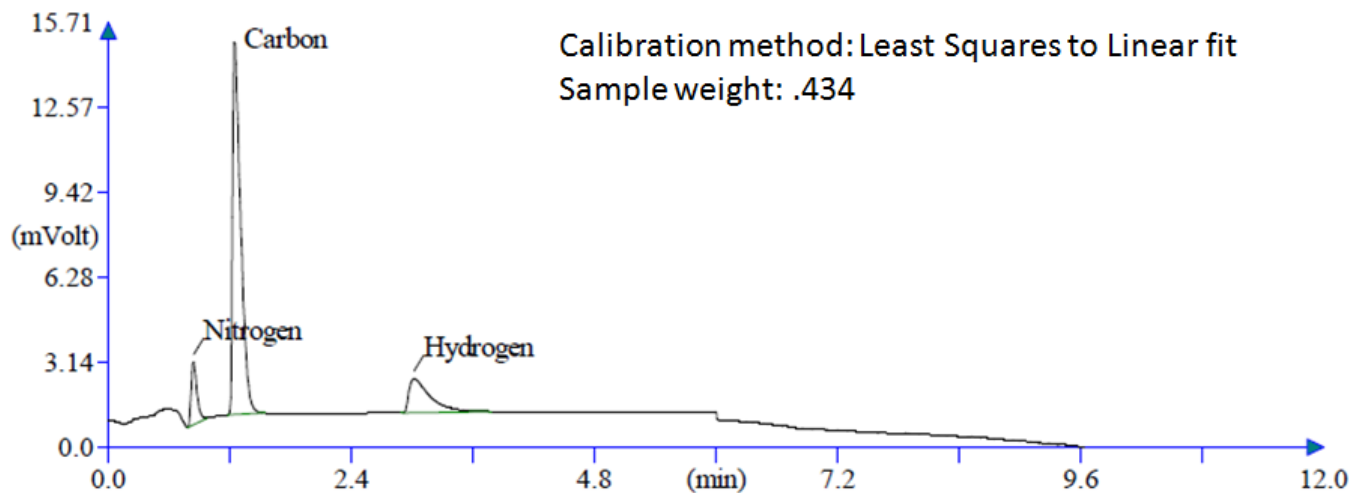

| Retention Time (min) | Component Name | Element % |
|----------------------|----------------|-----------|
| 0.842                | Nitrogen       | 23.48     |
| 1.242                | Carbon         | 70.62     |
| 3.017                | Hydrogen       | 5.90      |

**Calculated:**

Chemical Formula:  $C_{14}H_{14}N_4$   
Molecular Weight: 238.29  
Elemental Analysis: C, 70.57; H, 5.92; N, 23.51



**Figure S17: IR Spectra of L3a:**

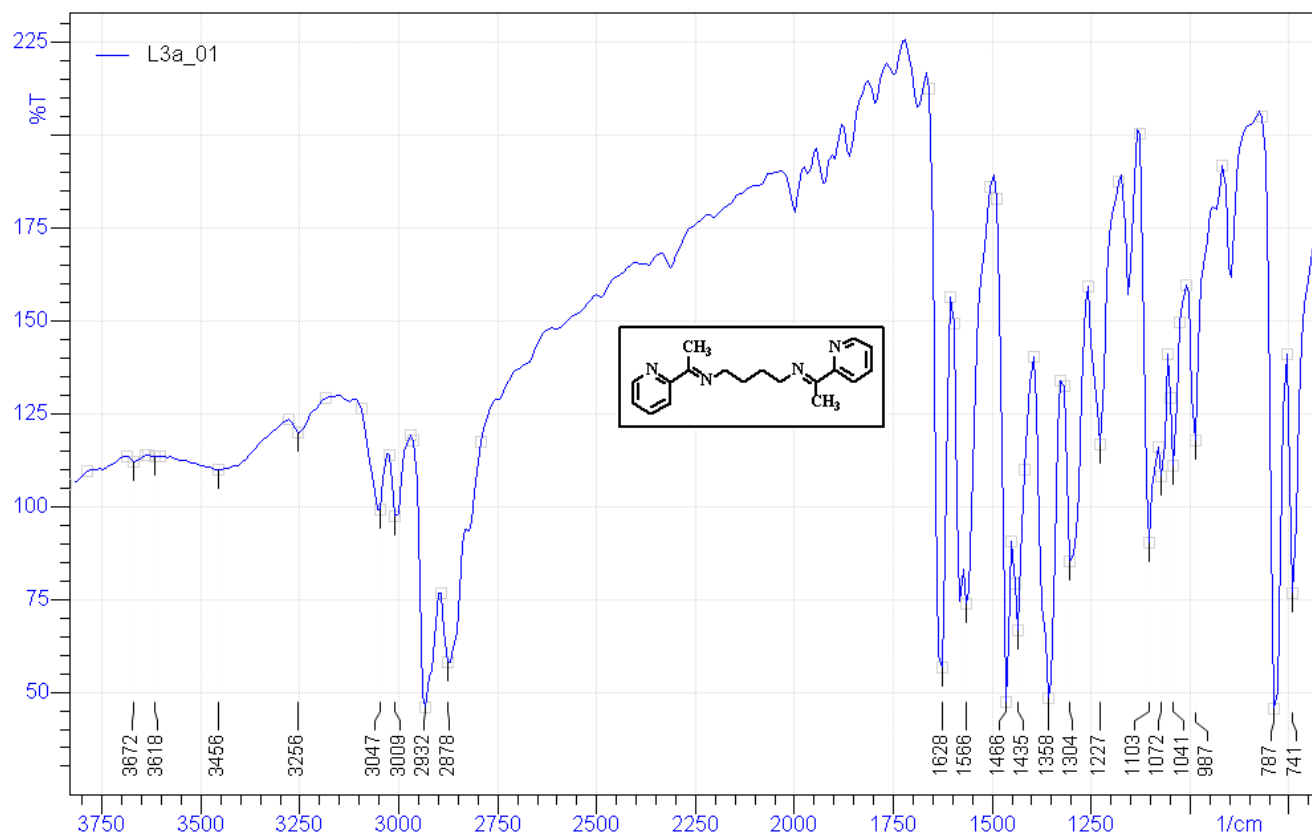

**IR: 3047(w), 3009(w), 2932(vs), 2878(vs), 1628(vs), 1566(vs), 1466(vs), 1435(vs), 1358(vs), 1304(s), 1227(w), 1103(s), 1072(w), 1041(w), 987(w), 787(vs), 741(s),**

Figure S18:  $^1\text{H}$  NMR Spectra of L3a:

### $^1\text{H}$ NMR Spectra of L3a

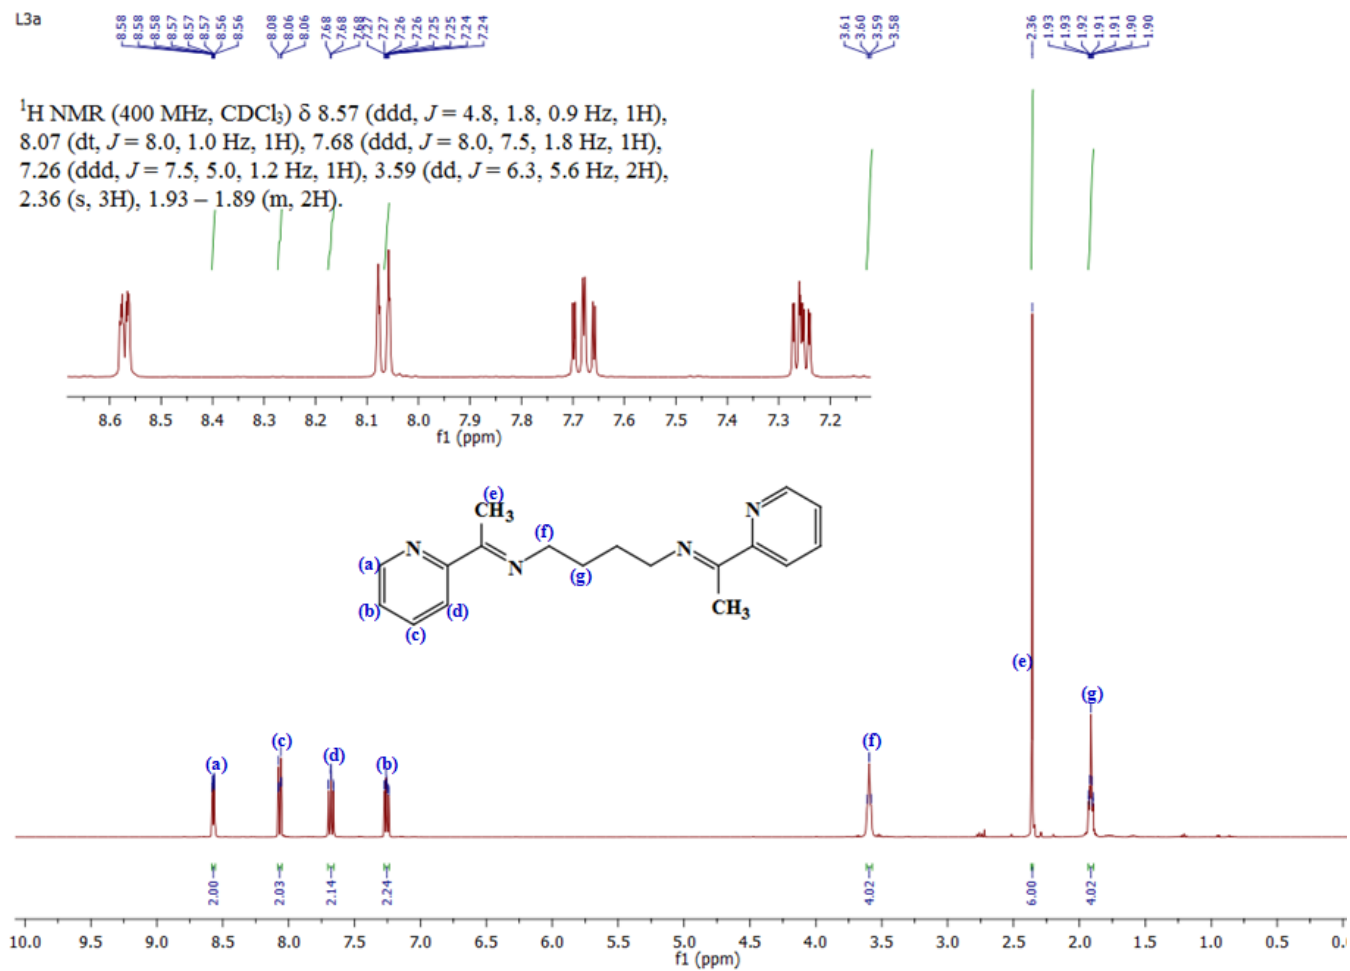

Figure S19:  $^{13}\text{C}$  NMR Spectra of L3a:

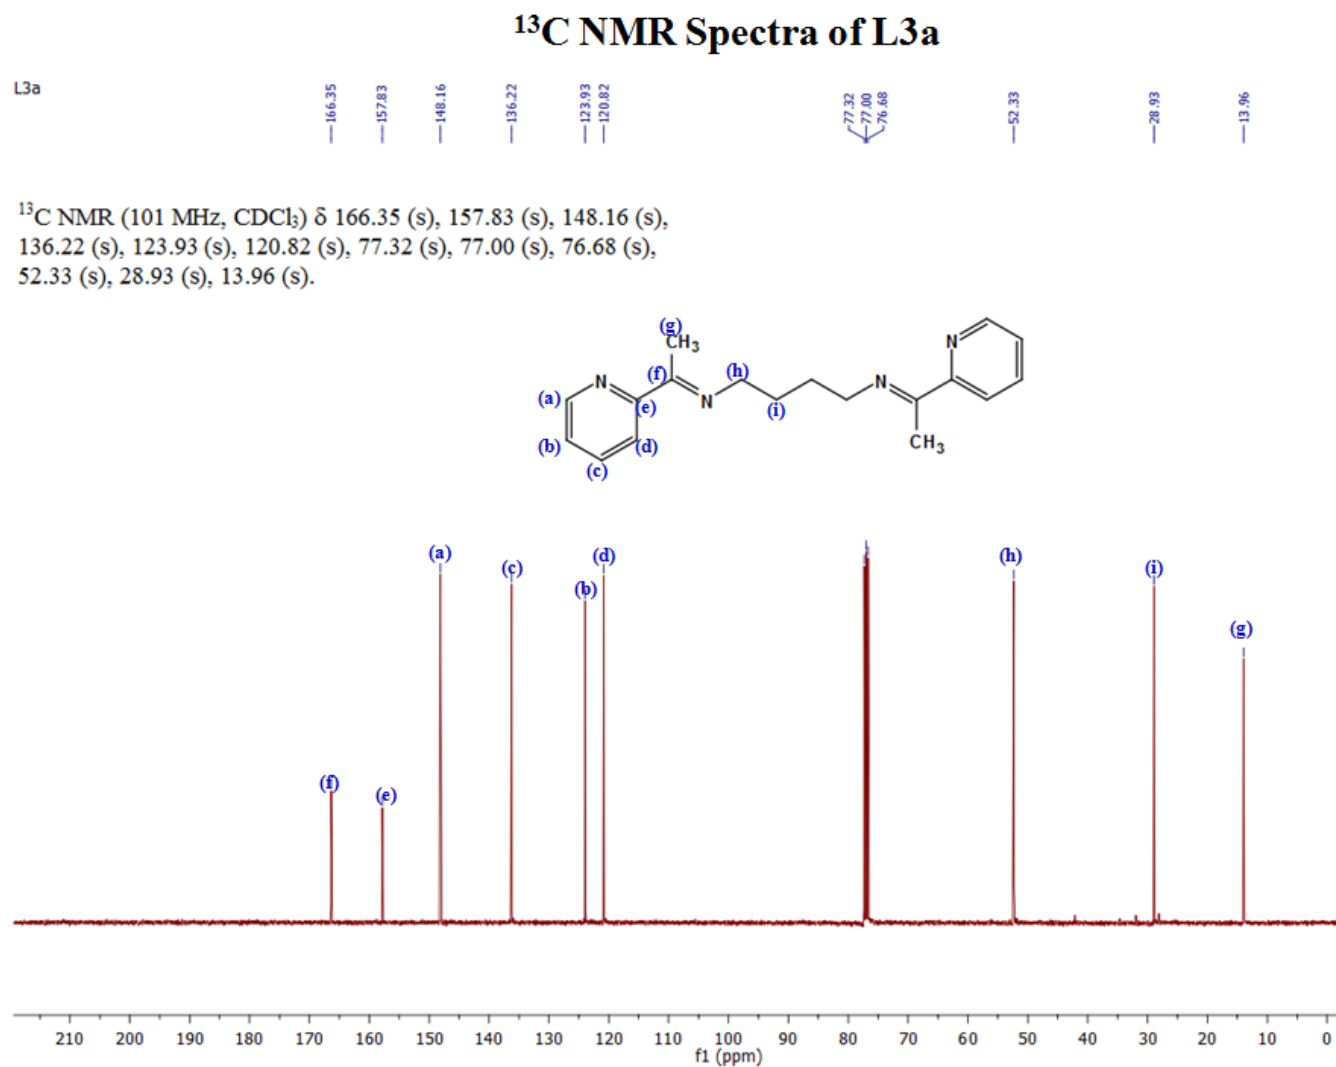

**Figure S20: Elemental Analysis of L3a:**

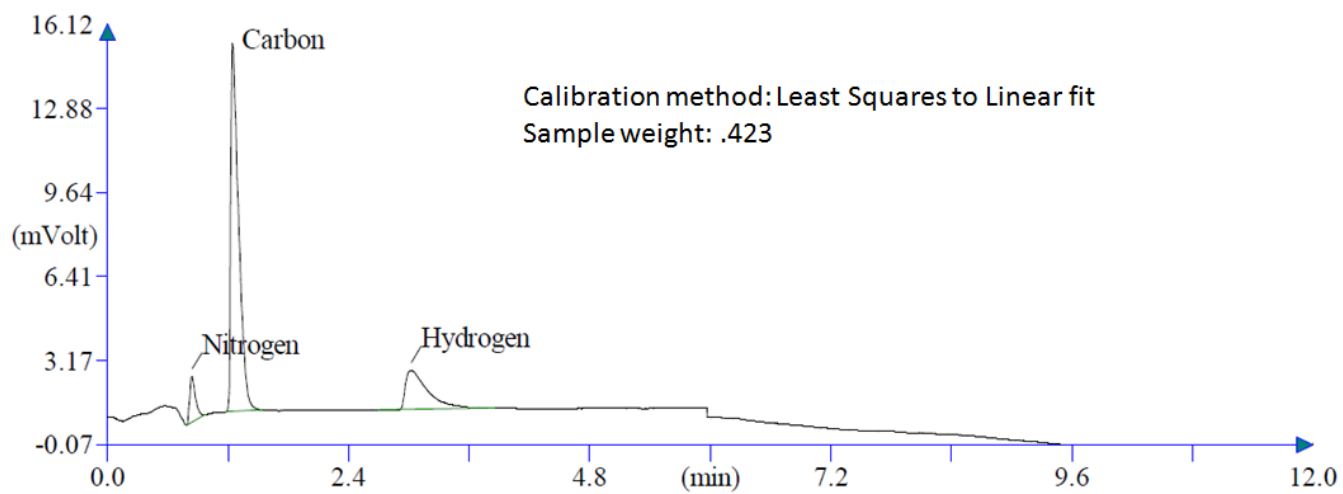

| Retention Time (min) | Component Name | Element % |
|----------------------|----------------|-----------|
| 0.842                | Nitrogen       | 19.00     |
| 1.242                | Carbon         | 73.5      |
| 3.025                | Hydrogen       | 7.50      |

**Calculated:**

Chemical Formula:  $C_{18}H_{22}N_4$   
Molecular Weight: 294.39  
Elemental Analysis: C, 73.44; H, 7.53; N, 19.03

**Figure S21: IR Spectra of L3b:**

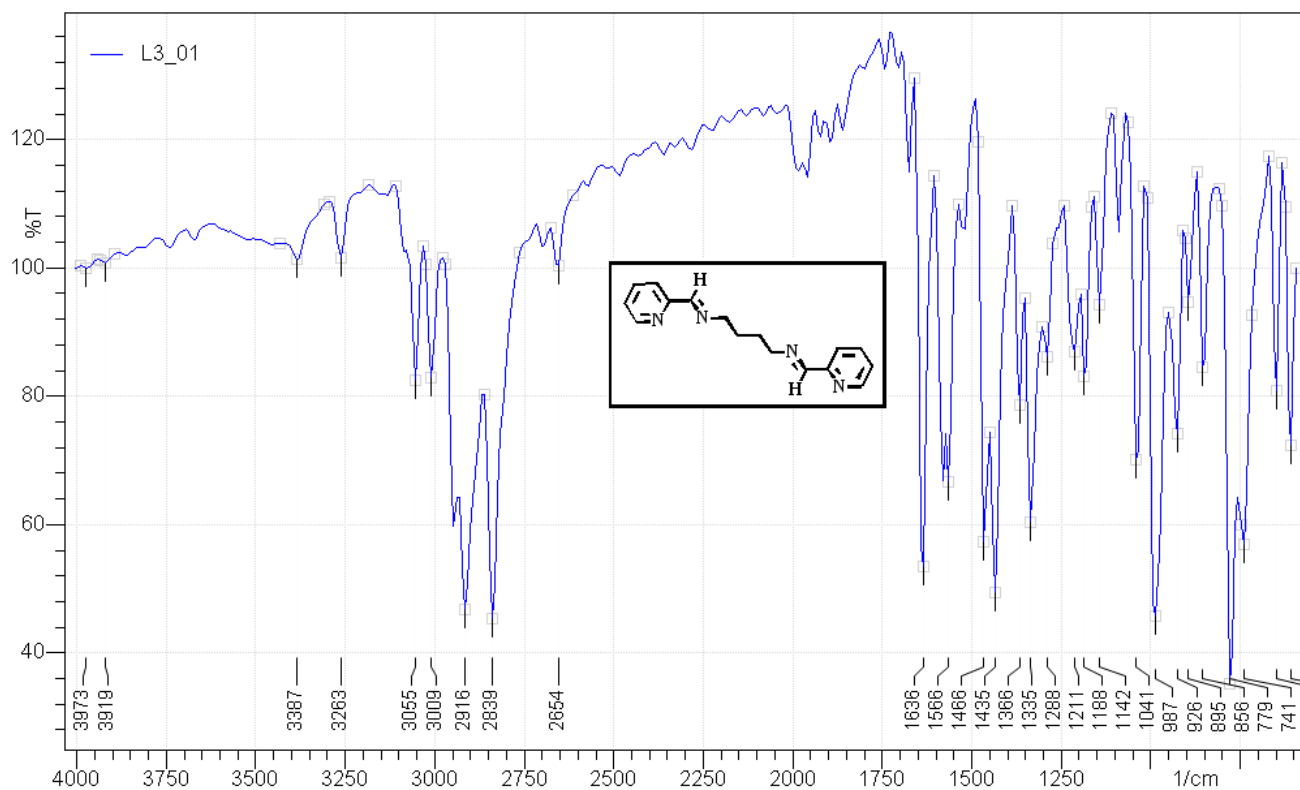

**IR: 3055(s), 3009(s), 2916(vs), 2839(vs), 1636(vs), 1566(vs), 1466(vs), 1435(vs), 1366(s), 1335(vs), 1288(w), 1211(w), 1188(w), 1188(w), 1142(w), 1041(s), 987(vs), 926(s), 895(w), 856(s), 779(vs), 741(s),**

Figure S22: <sup>1</sup>H NMR Spectra of L3b:

### <sup>1</sup>H NMR Spectra of L3b

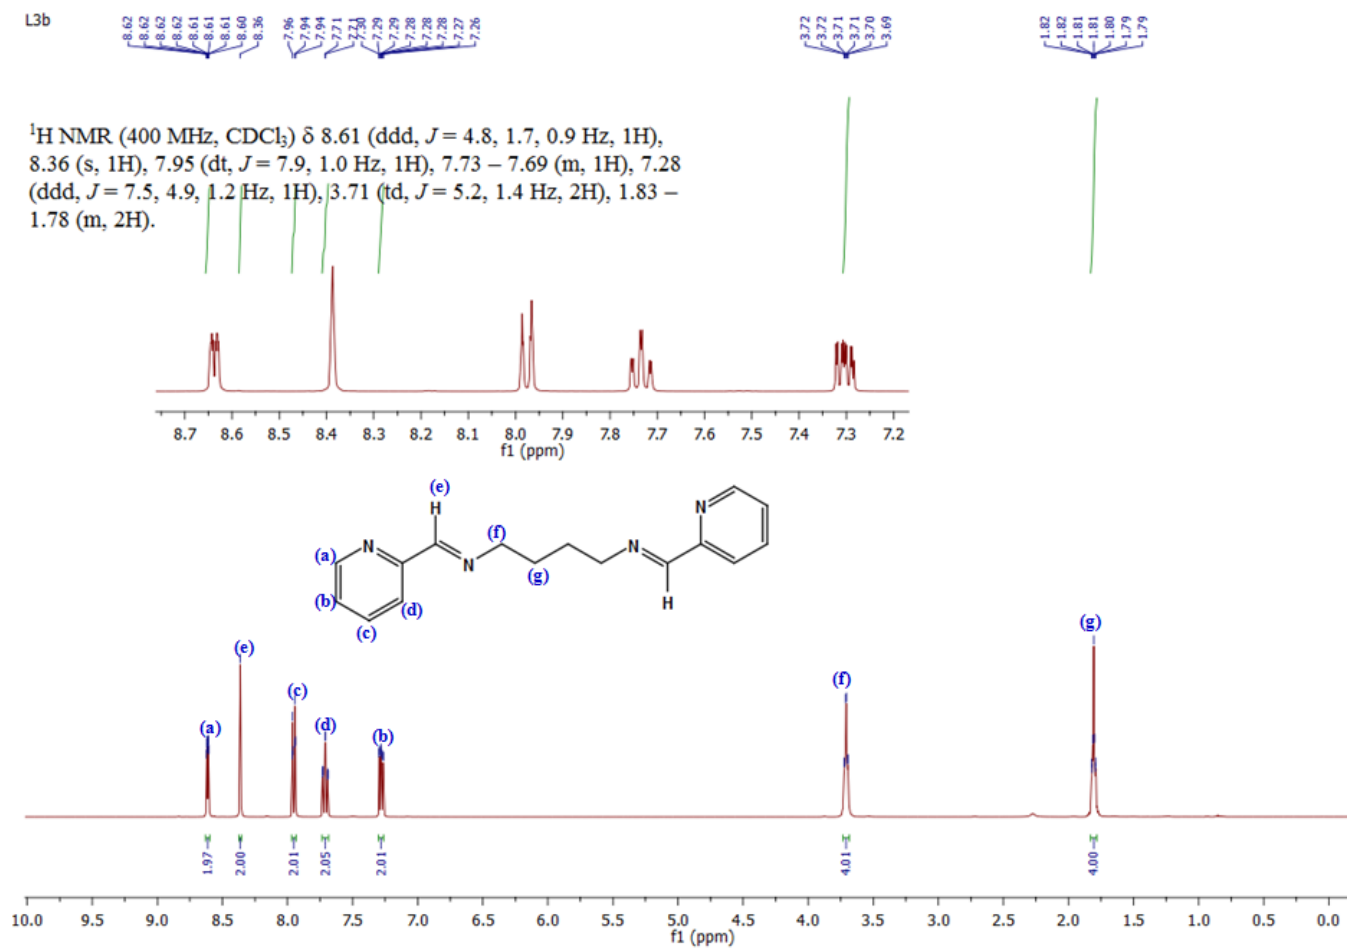

Figure S23:  $^{13}\text{C}$  NMR Spectra of L3b:

### $^{13}\text{C}$ NMR Spectra of L3b

L3b

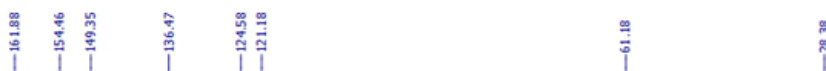

$^{13}\text{C}$  NMR (101 MHz,  $\text{CDCl}_3$ )  $\delta$  161.88 (s), 154.46 (s), 149.35 (s), 136.47 (s), 124.58 (s), 121.18 (s), 61.18 (s), 28.38 (s).

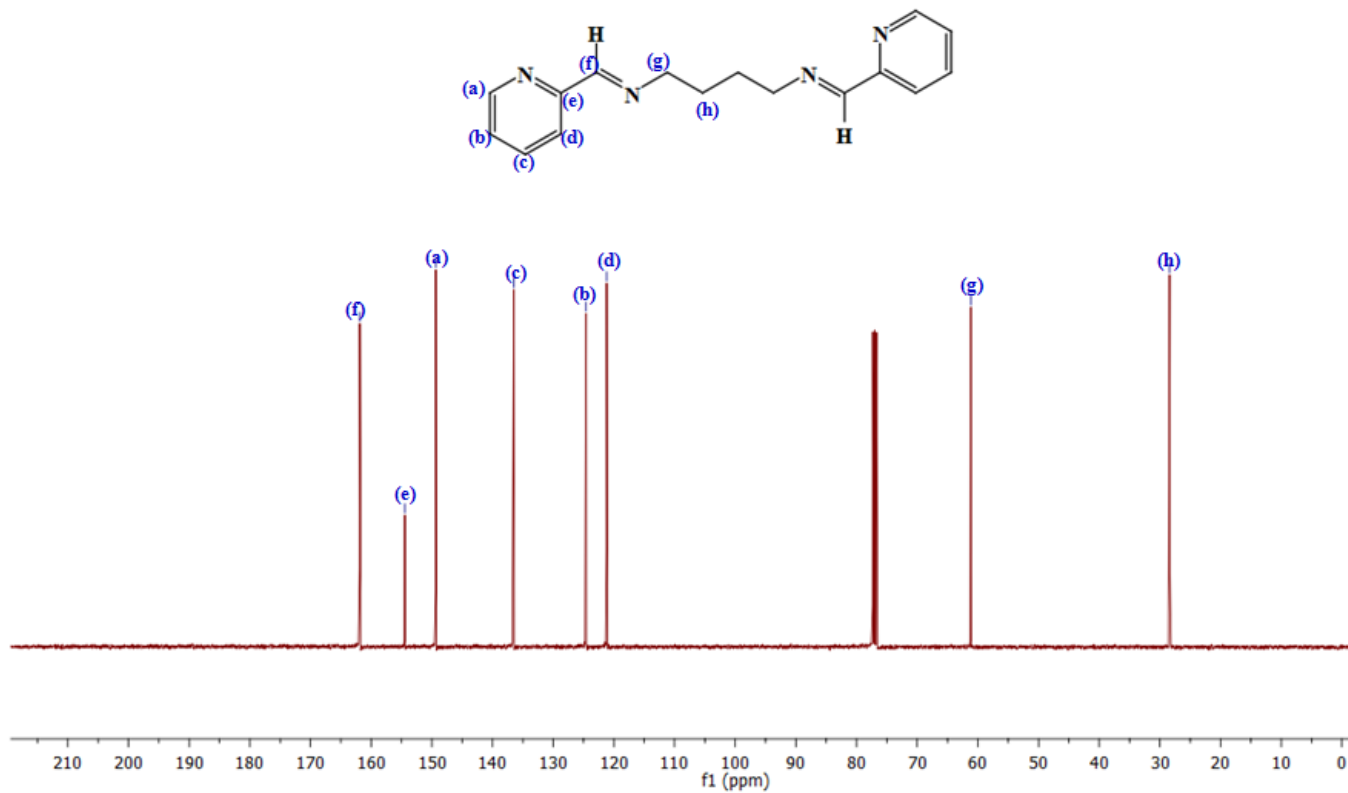

**Figure S24: Elemental Analysis of L3b:**

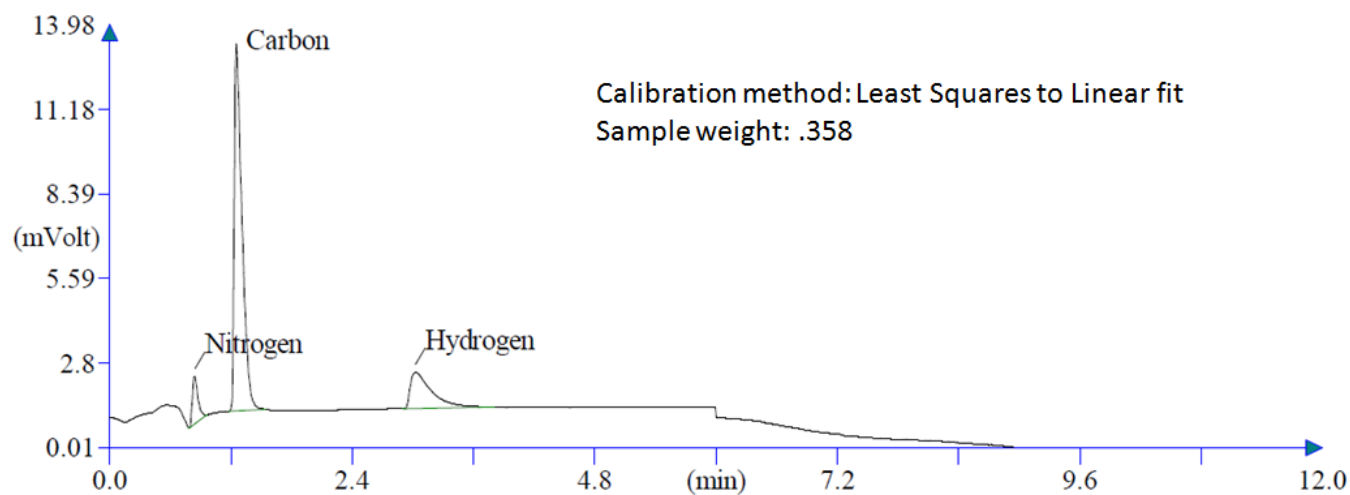

| Retention Time (min) | Component Name | Element % |
|----------------------|----------------|-----------|
| 0.842                | Nitrogen       | 21.01     |
| 1.250                | Carbon         | 72.21     |
| 3.025                | Hydrogen       | 6.78      |

**Calculated:**

Chemical Formula:  $C_{16}H_{18}N_4$   
Molecular Weight: 266.34  
Elemental Analysis: C, 72.15; H, 6.81; N, 21.04



Figure S25: ORTEP of L1a

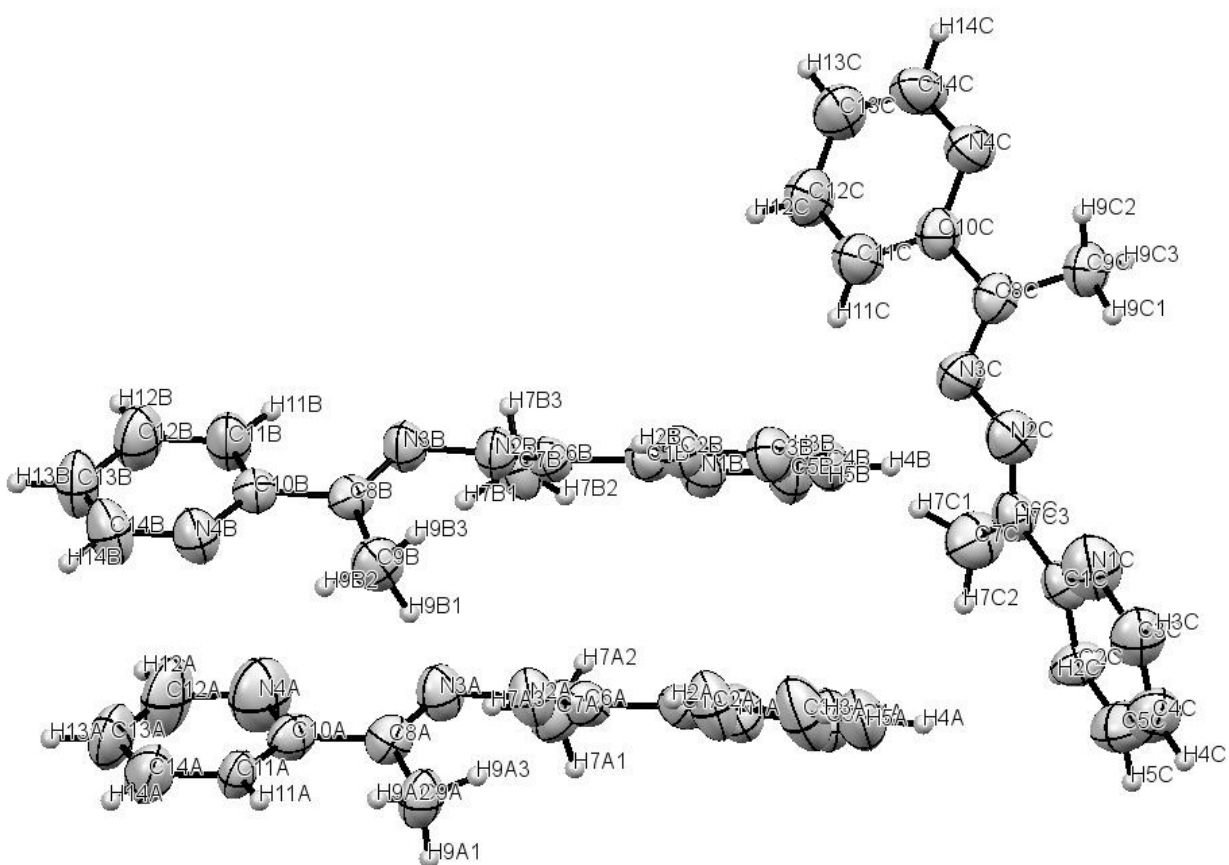

**Figure S26: ORTEP of L2a**

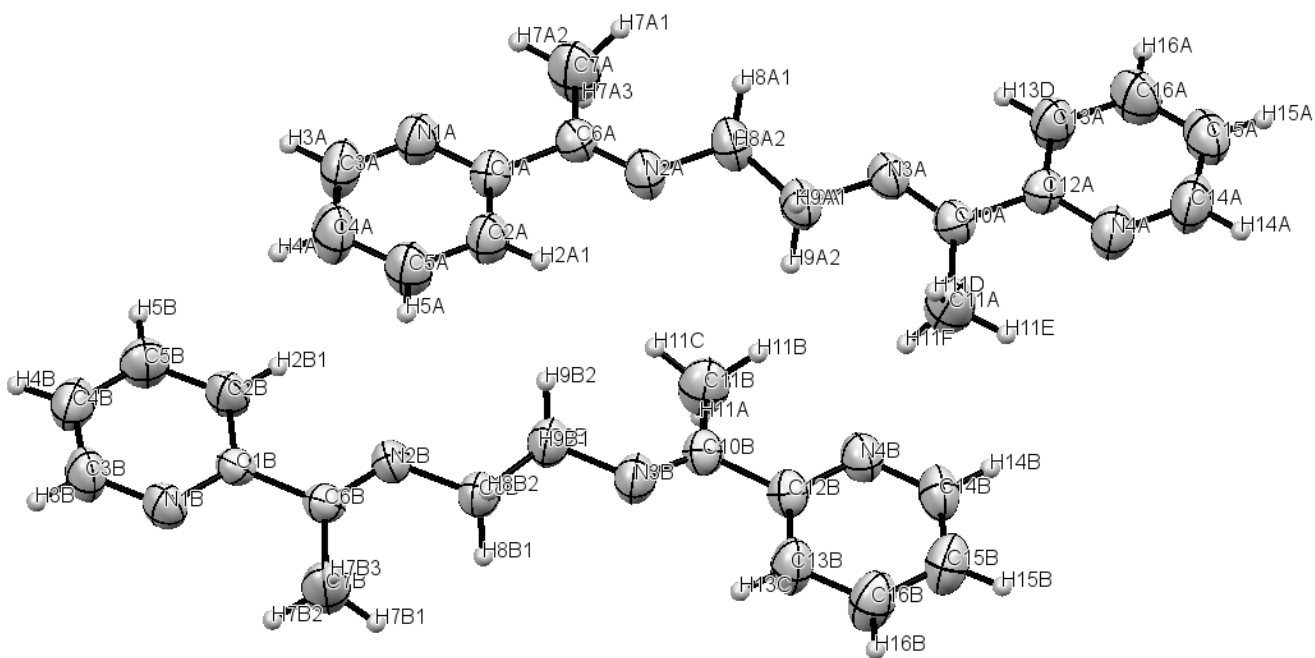

**Figure S27: ORTEP of L3b:**

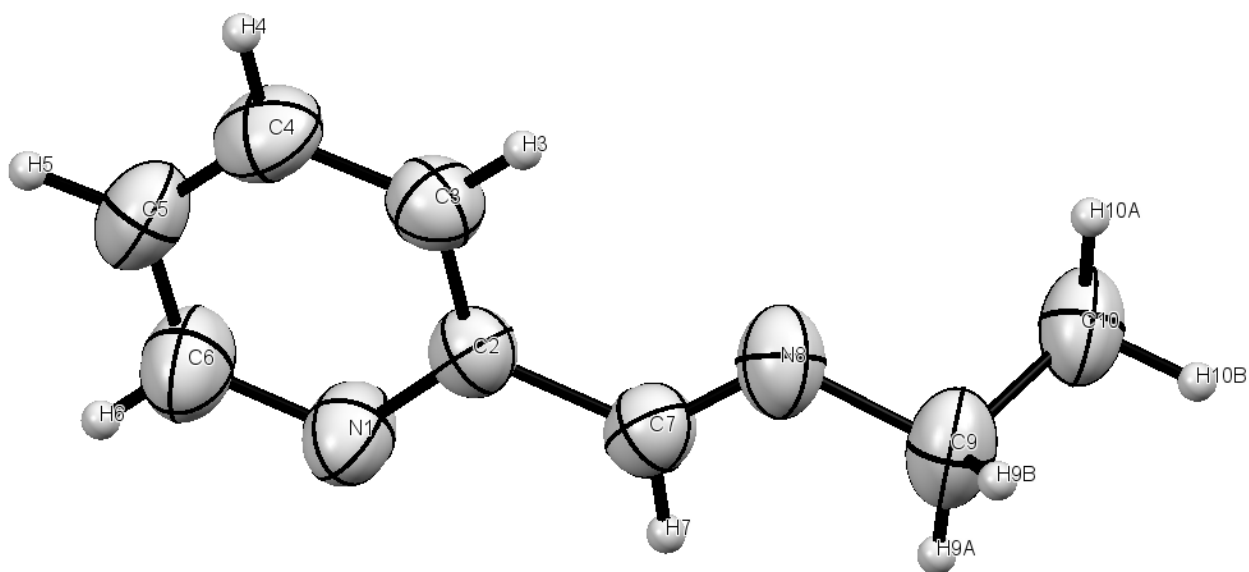

Figure S28: Solid State UV-Vis Spectrum of L1a:

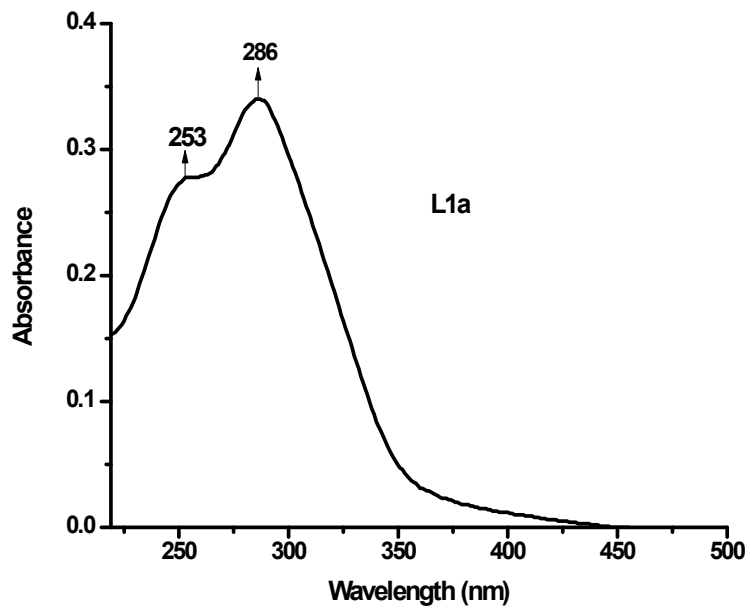

Figure S29: Solid State UV-Vis Spectrum of L2a:

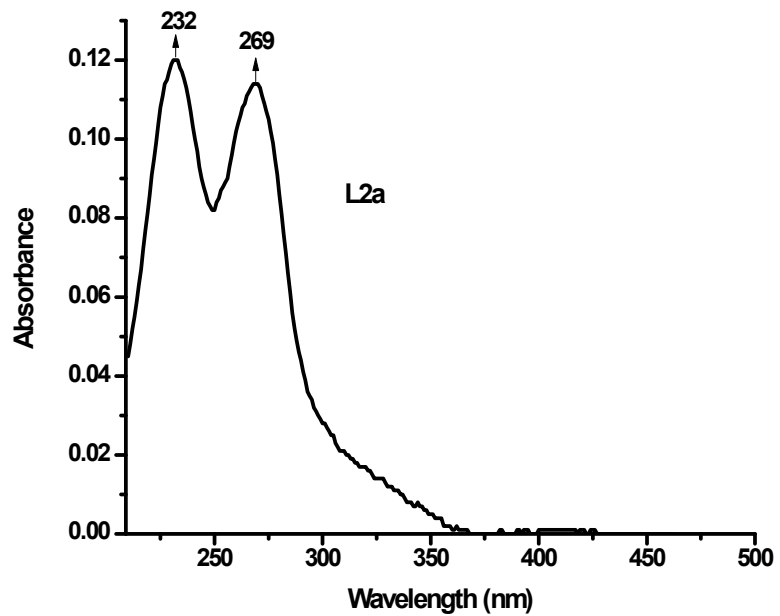

Figure S30: Solid State UV-Vis Spectrum of L3b:

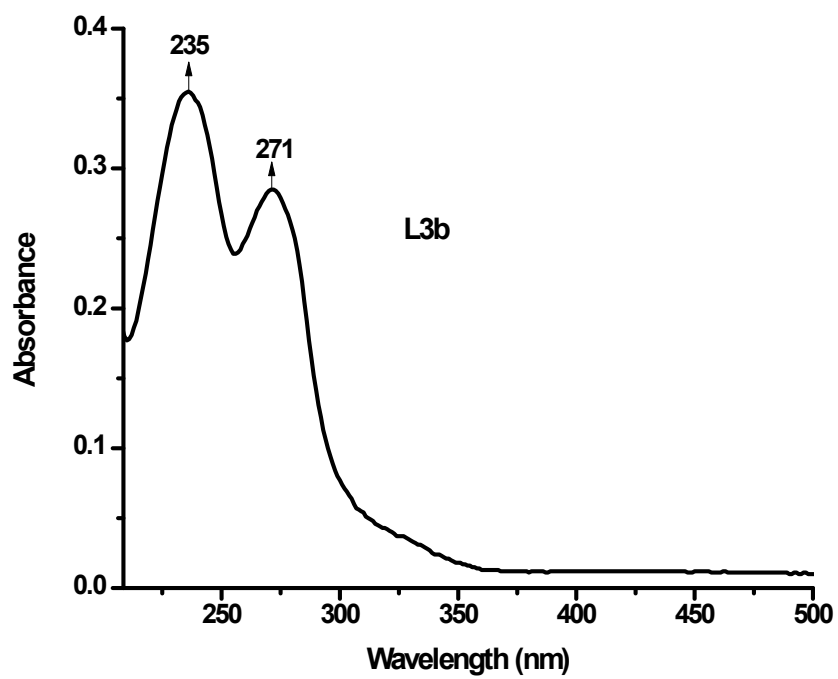

Figure S31: Excitation Spectra of L1b in  $\text{CHCl}_3$  in different concentrations: (a)  $10^{-3}\text{M}$ , (b)  $10^{-4}\text{M}$ , (c)  $10^{-5}\text{M}$

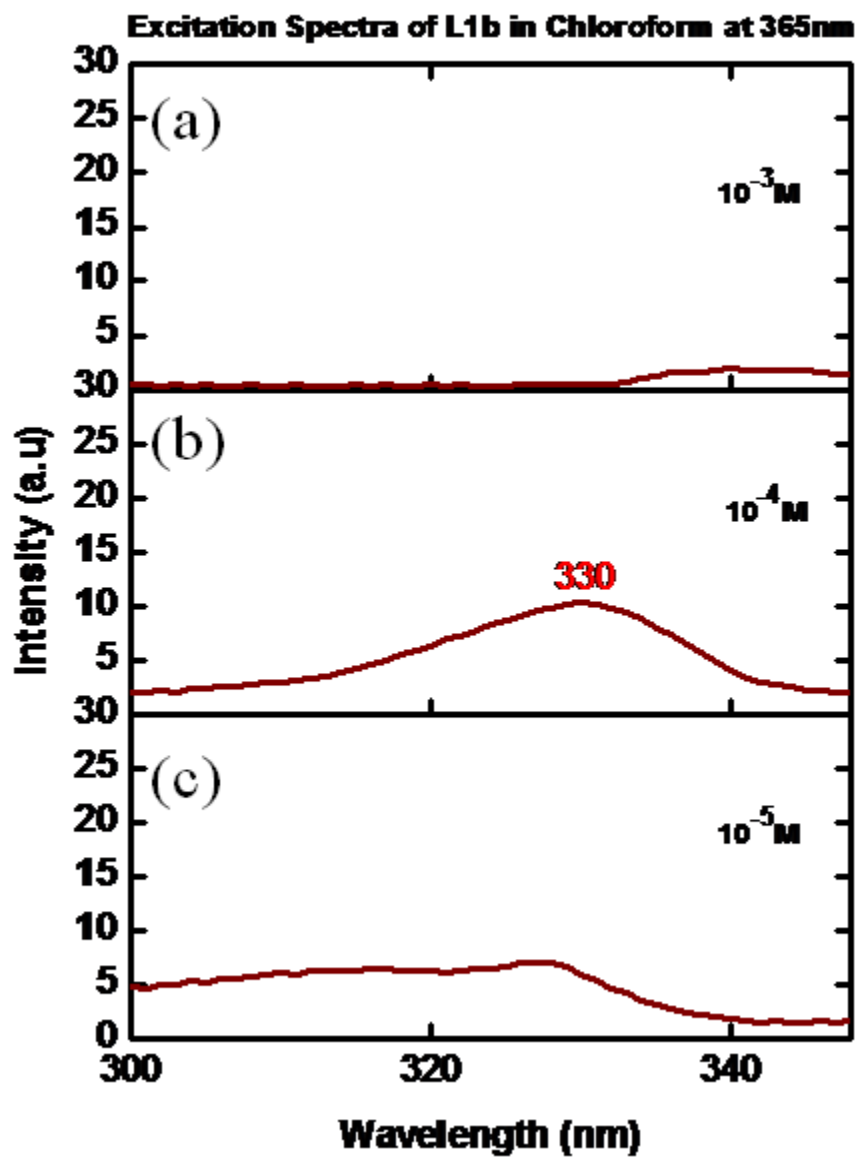

Figure S32: PL Spectra of L1b in CHCl<sub>3</sub> in different Concentrations: (a) 10<sup>-4</sup>M; (b) 10<sup>-5</sup>M

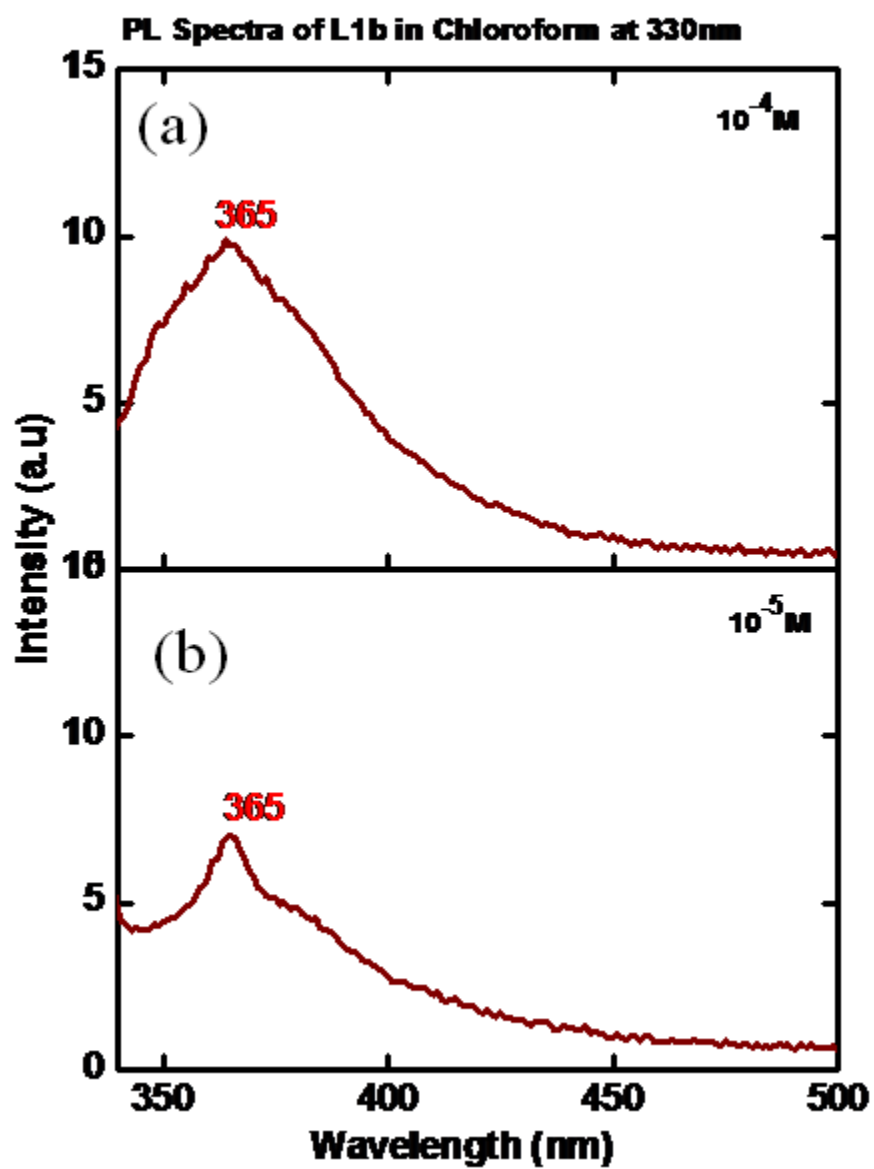

Figure S33: Excitation Spectra of L2a in CHCl<sub>3</sub> in different concentrations: (a)  $5 \times 10^{-2} \text{M}$  (b)  $10^{-2} \text{M}$  (c)  $5 \times 10^{-3} \text{M}$ , (d)  $10^{-3} \text{M}$  (Emission Wavelength is kept at 370 nm)

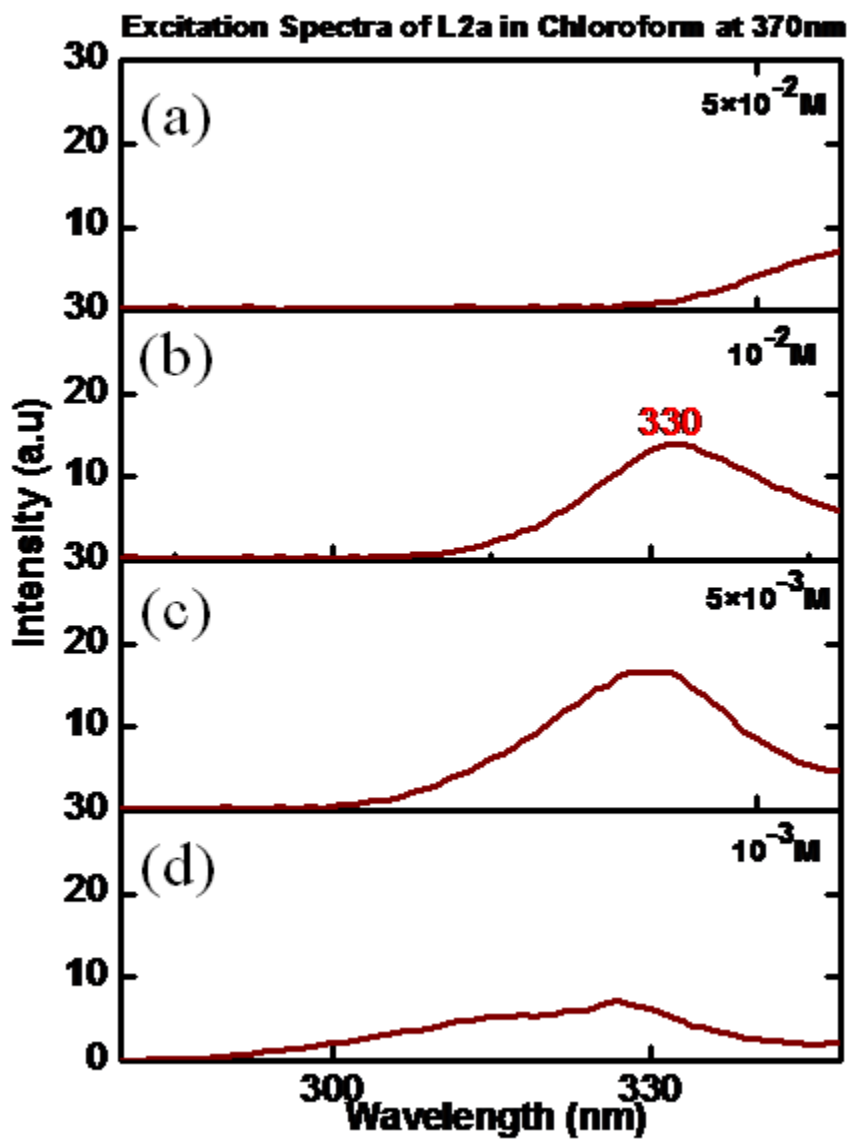

Figure S34: Excitation Spectra of L3a in CHCl<sub>3</sub> in different concentrations: (a) 5×10<sup>-1</sup>M (b) (a) 2×10<sup>-1</sup>M; (c) 10<sup>-1</sup>M (d) 5 ×10<sup>-2</sup>M, (e) 10<sup>-2</sup>M, (f) 5×10<sup>-3</sup>M; (g) 10<sup>-3</sup> (Emission Wavelength is kept at 460 nm)

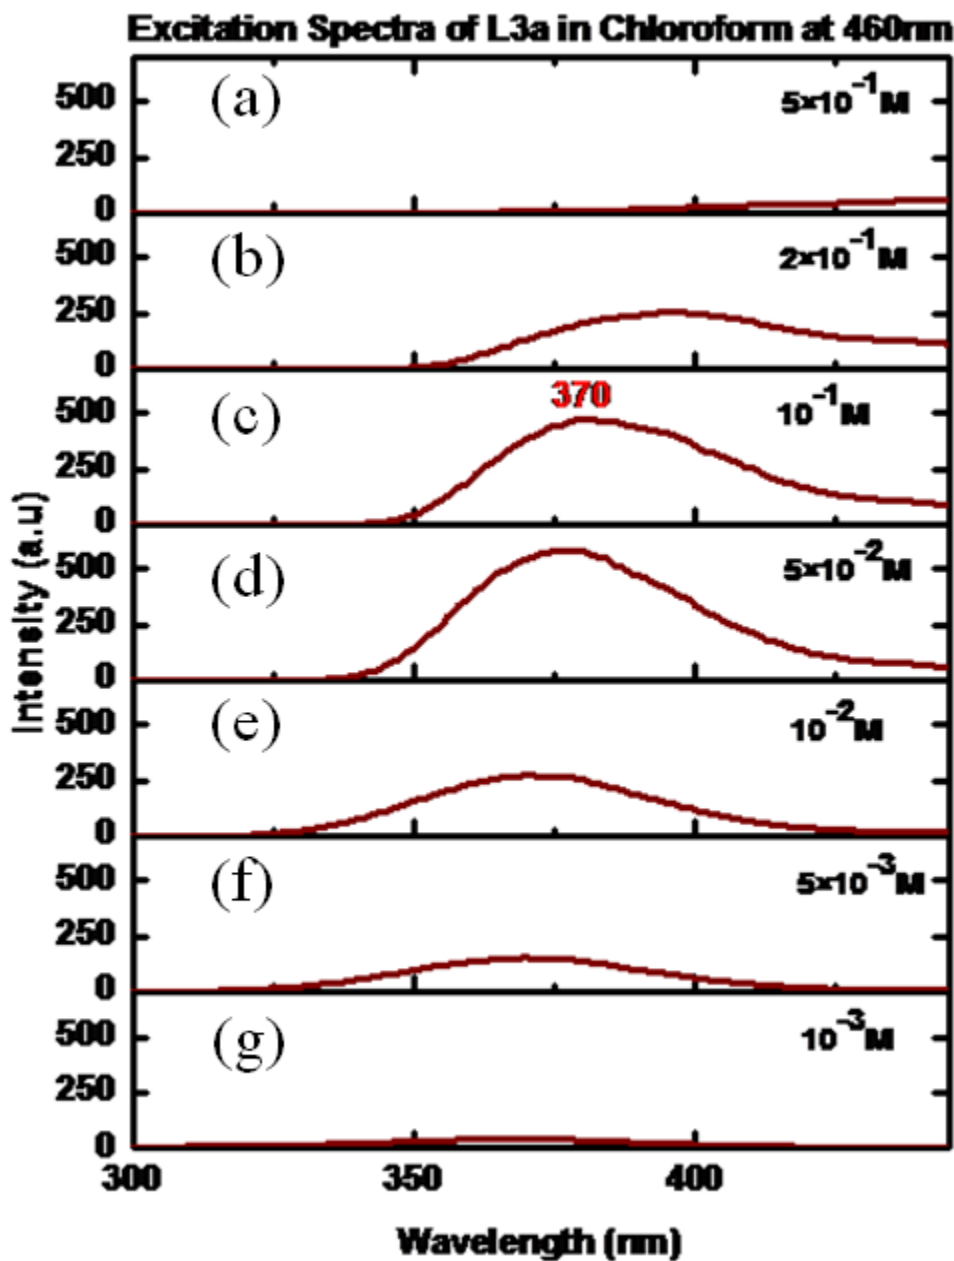



Figure S35: PL Spectra of L3a in CHCl<sub>3</sub> in different concentrations: (a)  $5 \times 10^{-1} \text{M}$  (b)  $2 \times 10^{-1} \text{M}$ ; (c)  $10^{-1} \text{M}$  (d)  $5 \times 10^{-2} \text{M}$ , (e)  $10^{-2} \text{M}$ , (f)  $5 \times 10^{-3} \text{M}$ ; (g)  $10^{-3}$  (Excitation Wavelength is kept at 420 nm)

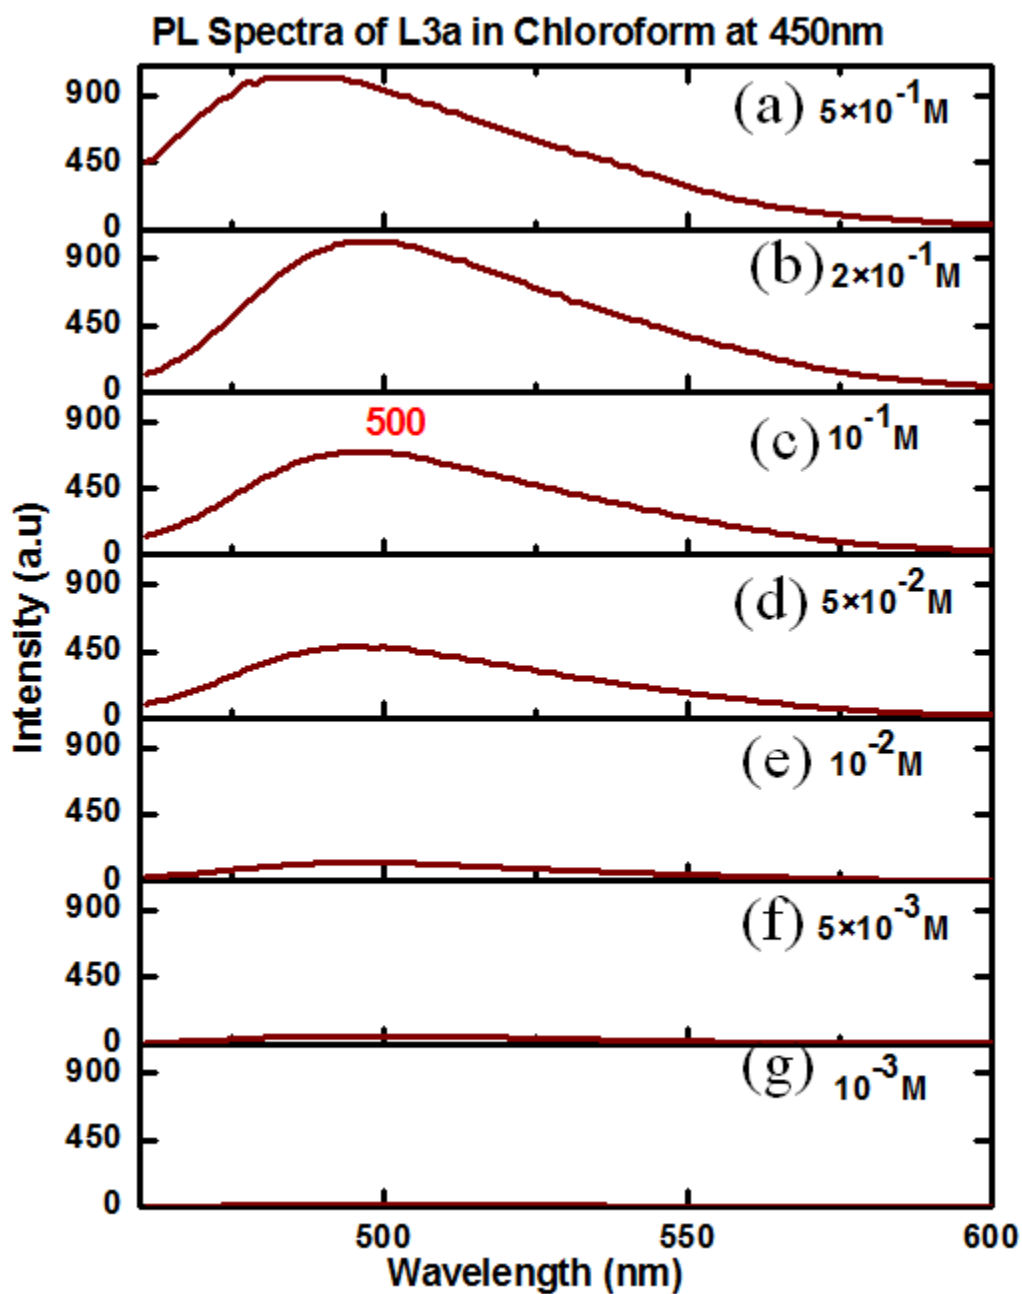

Figure S36: PL Spectra (at an excitation wavelength of 450 nm) of L3a in solid state

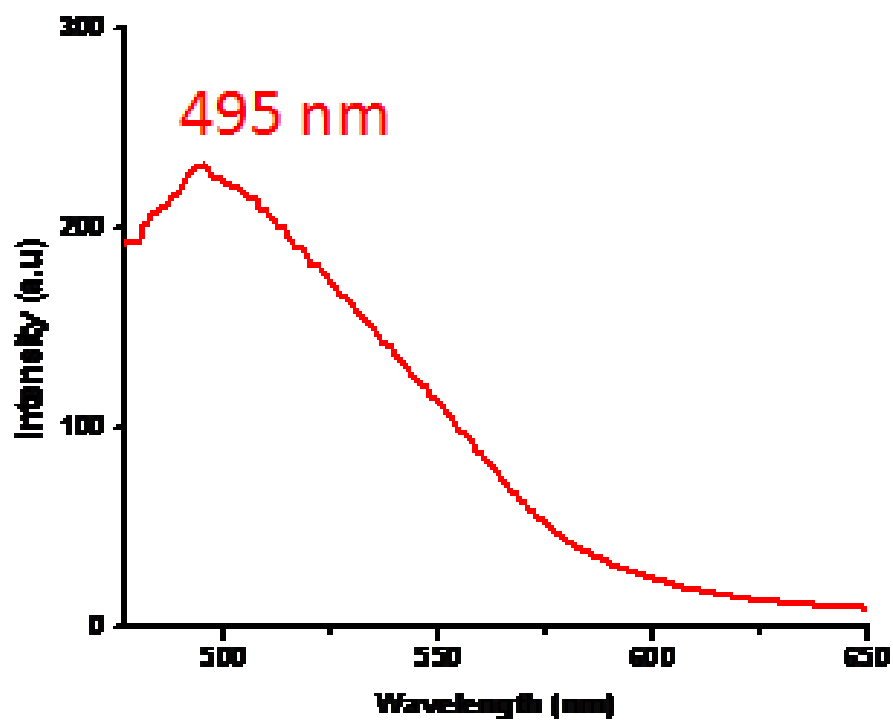

Figure S37:  $^1\text{H}$  NMR spectra of L3b in  $\text{CDCl}_3$  by changing the concentration of compound; (a) 1 M; (b)  $10^{-1}$  M; (c)  $10^{-2}$  M; (d)  $10^{-3}$  M

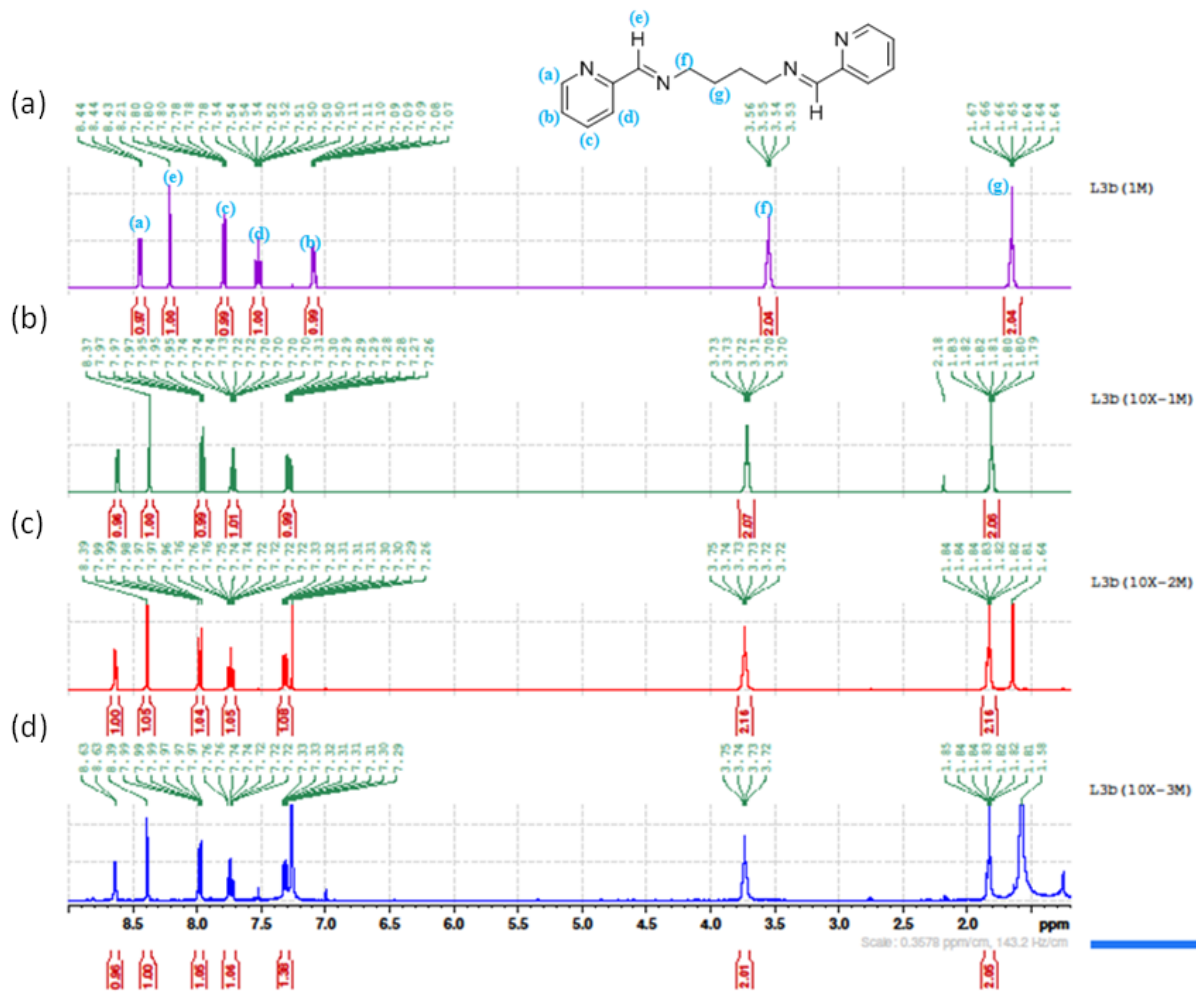

Figure S38: NOESY of L3b in CDCl<sub>3</sub> at a concentration of 1 M

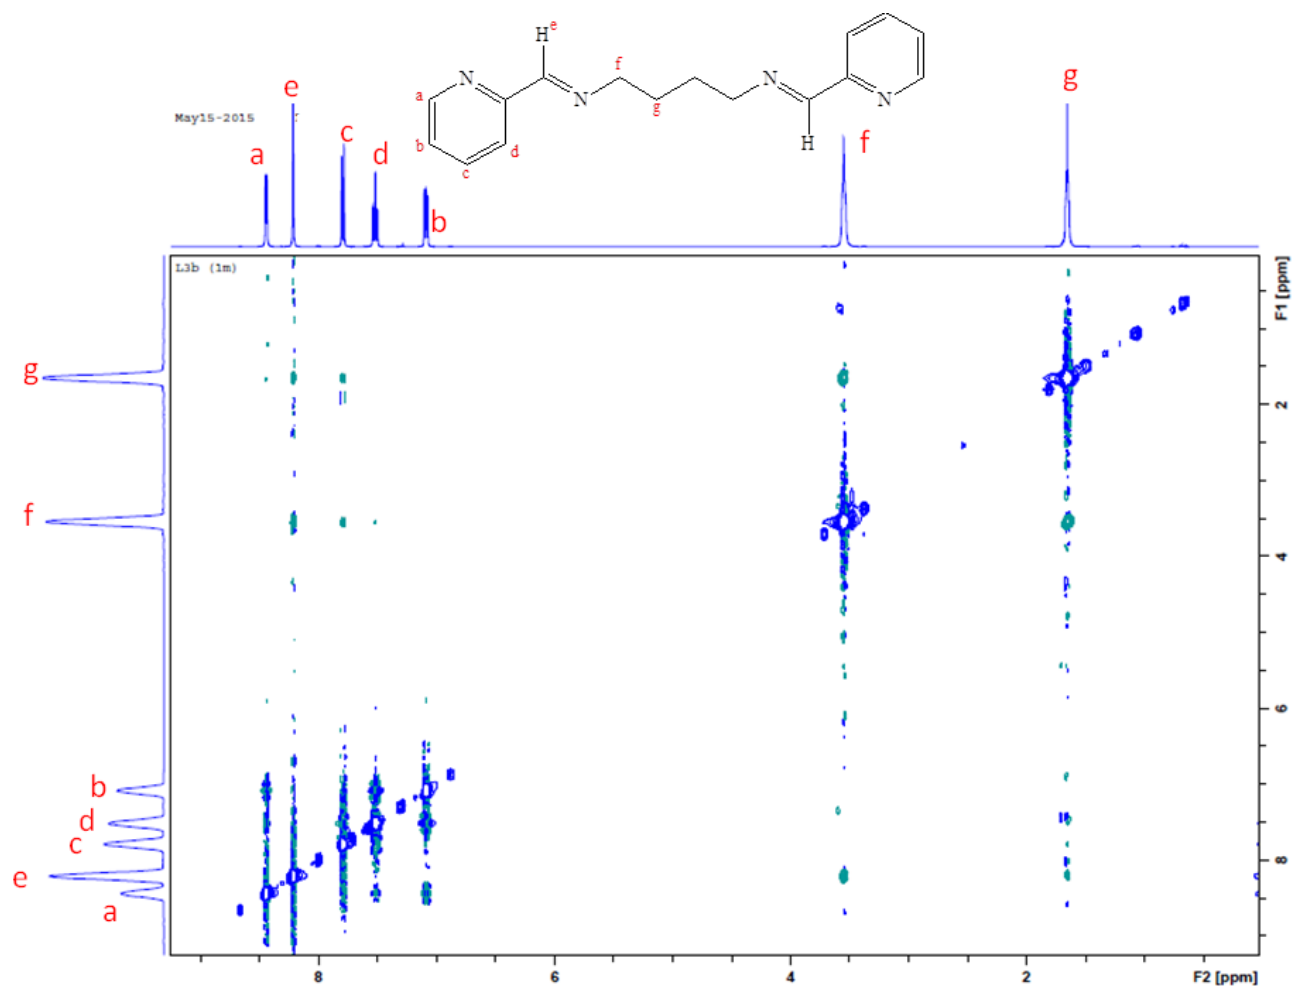

Figure S39: NOESY of L3b in CDCl<sub>3</sub> at a concentration of 10<sup>-2</sup> M

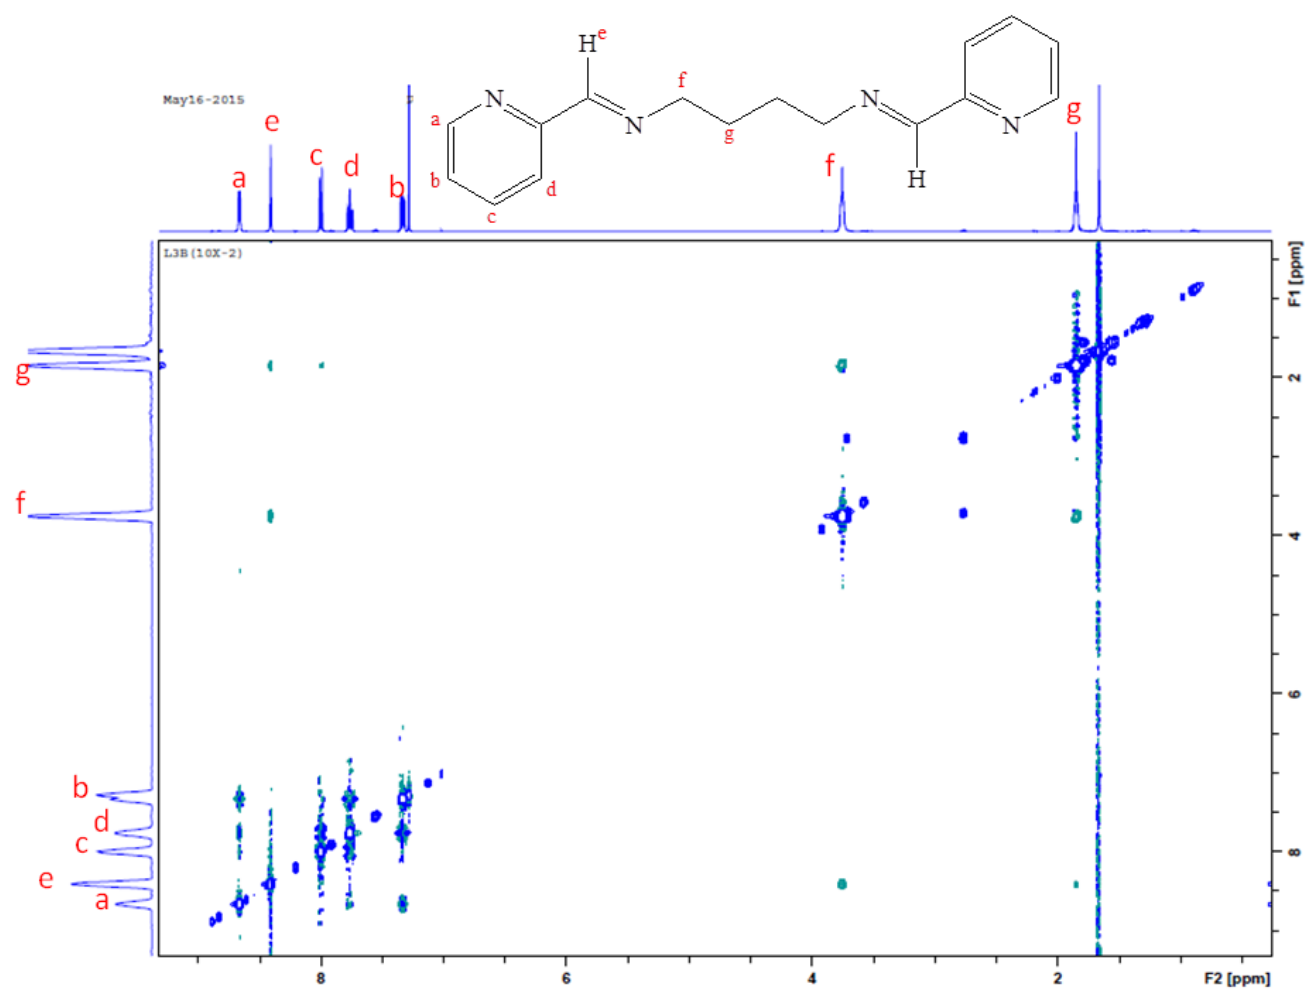

## Compound L1a

### checkCIF/PLATON (full publication check)

---

THIS REPORT IS FOR GUIDANCE ONLY. IF USED AS PART OF A REVIEW PROCEDURE FOR PUBLICATION, IT SHOULD NOT REPLACE THE EXPERTISE OF AN EXPERIENCED CRYSTALLOGRAPHIC REFEREE.

No syntax errors found.

CIF dictionary

Please wait while processing ....

Interpreting this report

### Datablock: I

---

Bond precision:            C-C = 0.0056 Å                            Wavelength=0.71073

Cell:            a=8.6694(4)            b=17.8009(8)            c=12.8064(6)

                  alpha=90            beta=98.394(4)            gamma=90

Temperature: 293 K

|                        | Calculated  | Reported    |
|------------------------|-------------|-------------|
| Volume                 | 1955.15(16) | 1955.15(16) |
| Space group            | P 21        | P 21        |
| Hall group             | P 2yb       | P 2yb       |
| Moiety formula         | C14 H14 N4  | C14 H14 N4  |
| Sum formula            | C14 H14 N4  | C14 H14 N4  |
| Mr                     | 238.29      | 238.29      |
| Dx,g cm <sup>-3</sup>  | 1.214       | 1.214       |
| Z                      | 6           | 6           |
| Mu (mm <sup>-1</sup> ) | 0.076       | 0.076       |
| F000                   | 756.0       | 756.0       |
| F000'                  | 756.22      |             |
| h,k,lmax               | 10,21,15    | 10,21,15    |
| Nref                   | 7679[ 3970] | 7598        |
| Tmin,Tmax              | 0.982,0.985 | 0.843,1.000 |

Tmin' 0.977

Correction method= # Reported T Limits: Tmin=0.843 Tmax=1.000

AbsCorr = MULTI-SCAN

Data completeness= 1.91/0.99 Theta(max)= 25.990

R(reflections)= 0.0637( 4636) wR2(reflections)= 0.1900( 7598)

S = 1.001 Npar= 493

---

The following ALERTS were generated. Each ALERT has the format

**test-name\_ALERT\_alert-type\_alert-level.**

Click on the hyperlinks for more details of the test.

---

**Alert level B**

[PLAT230\\_ALERT\\_2\\_B](#) Hirshfeld Test Diff for N4A -- C10A .. 7.2 su

**And 3 other PLAT230 Alerts**

More ...

---

**Alert level C**

[STRVA01\\_ALERT\\_4\\_C](#) Flack parameter is too small

From the CIF: `_refine_ls_abs_structure_Flack` -2.000

From the CIF: `_refine_ls_abs_structure_Flack_su` 3.000

**And 4 other PLAT230 Alerts**

More ...

[PLAT241\\_ALERT\\_2\\_C](#) High Ueq as Compared to Neighbors for ..... N4A Check

**And 2 other PLAT241 Alerts**

More ...

[PLAT242\\_ALERT\\_2\\_C](#) Low Ueq as Compared to Neighbors for ..... C11A Check

[PLAT340\\_ALERT\\_3\\_C](#) Low Bond Precision on C-C Bonds ..... 0.0056 Ang.

[PLAT411\\_ALERT\\_2\\_C](#) Short Inter H...H Contact H3B .. H11A .. 2.00 Ang.

[PLAT412\\_ALERT\\_2\\_C](#) Short Intra XH3 .. XHn H11A .. H9A2 .. 1.81 Ang.

[PLAT412\\_ALERT\\_2\\_C](#) Short Intra XH3 .. XHn H2C .. H7C2 .. 1.87 Ang.

PLAT413\_ALERT\_2\_C Short Inter XH3 .. XHn H2C .. H9A1 .. 2.06 Ang.

---

● **Alert level G**

PLAT005\_ALERT\_5\_G No iucr\_refine\_instructions\_details in the CIF Please Do !

PLAT032\_ALERT\_4\_G Std. Uncertainty on Flack Parameter Value High . 3.000 Report

PLAT072\_ALERT\_2\_G SHELXL First Parameter in WGHT Unusually Large. 0.10 Report

PLAT199\_ALERT\_1\_G Reported cell\_measurement\_temperature ..... (K) 293 Check

PLAT200\_ALERT\_1\_G Reported diffn\_ambient\_temperature ..... (K) 293 Check

PLAT720\_ALERT\_4\_G Number of Unusual/Non-Standard Labels ..... 18 Note

PLAT899\_ALERT\_4\_G SHELXL97 is Deprecated and Succeeded by SHELXL 2014 Note

---

0 **ALERT level A** = Most likely a serious problem - resolve or explain

4 **ALERT level B** = A potentially serious problem, consider carefully

14 **ALERT level C** = Check. Ensure it is not caused by an omission or oversight

7 **ALERT level G** = General information/check it is not something unexpected



## Compound L2a

checkCIF/PLATON (full publication check)

---

THIS REPORT IS FOR GUIDANCE ONLY. IF USED AS PART OF A REVIEW PROCEDURE FOR PUBLICATION, IT SHOULD NOT REPLACE THE EXPERTISE OF AN EXPERIENCED CRYSTALLOGRAPHIC REFEREE.

No syntax errors found.

[CIF dictionary](#)

Please wait while processing ....

[Interpreting this report](#)

### **Datablock: I**

---

Bond precision: C-C = 0.0048 Å Wavelength=0.71073

Cell: a=19.379(5) b=24.584(5) c=12.300(5)  
alpha=90 beta=90 gamma=90

Temperature: 293 K

|                | Calculated  | Reported    |
|----------------|-------------|-------------|
| Volume         | 5860(3)     | 5860(3)     |
| Space group    | P c a b     | P c a b     |
| Hall group     | -P 2bc 2ac  | -P 2bc 2ac  |
| Moiety formula | C16 H18 N4  | C16 H18 N4  |
| Sum formula    | C16 H18 N4  | C16 H18 N4  |
| Mr             | 266.34      | 266.34      |
| Dx,g cm-3      | 1.208       | 1.208       |
| Z              | 16          | 16          |
| Mu (mm-1)      | 0.075       | 0.075       |
| F000           | 2272.0      | 2272.0      |
| F000'          | 2272.67     |             |
| h,k,lmax       | 23,30,15    | 23,30,15    |
| Nref           | 5757        | 5740        |
| Tmin,Tmax      | 0.982,0.985 | 0.900,1.000 |
| Tmin'          | 0.978       |             |

Correction method= # Reported T Limits: Tmin=0.900 Tmax=1.000  
AbsCorr = MULTI-SCAN  
Data completeness= 0.997                      Theta(max)= 26.000  
R(reflections)= 0.0813( 2710)                      wR2(reflections)= 0.2360( 5740)  
S = 1.038                                      Npar= 366

---

The following ALERTS were generated. Each ALERT has the format

**test-name\_ALERT\_alert-type\_alert-level.**

Click on the hyperlinks for more details of the test.

---

● **Alert level C**

[PLAT026\\_ALERT\\_3\\_C](#) Ratio Observed / Unique Reflections too Low .... 47 %  
[PLAT147\\_ALERT\\_1\\_C](#) su on Symmetry Constrained Cell Angle(s) ..... Please Check  
[PLAT242\\_ALERT\\_2\\_C](#) Low Ueq as Compared to Neighbors for ..... C6A Check  
[PLAT340\\_ALERT\\_3\\_C](#) Low Bond Precision on C-C Bonds ..... 0.0048 Ang.  
[PLAT790\\_ALERT\\_4\\_C](#) Centre of Gravity not Within Unit Cell: Resd. # 1 Note  
C16 H18 N4

---

● **Alert level G**

[PLAT005\\_ALERT\\_5\\_G](#) No `_iucr_refine_instructions_details` in the CIF Please Do !  
[PLAT128\\_ALERT\\_4\\_G](#) Alternate Setting for Input Space Group `Pcab` `Pbca` Note  
[PLAT153\\_ALERT\\_1\\_G](#) The su's on the Cell Axes are Equal ..... 0.00500 Ang.  
[PLAT199\\_ALERT\\_1\\_G](#) Reported `_cell_measurement_temperature` ..... (K) 293 Check  
[PLAT200\\_ALERT\\_1\\_G](#) Reported `_diffn_ambient_temperature` ..... (K) 293 Check  
[PLAT720\\_ALERT\\_4\\_G](#) Number of Unusual/Non-Standard Labels ..... 16 Note  
[PLAT899\\_ALERT\\_4\\_G](#) SHELXL97 is Deprecated and Succeeded by SHELXL 2014 Note

---

0 **ALERT level A** = Most likely a serious problem - resolve or explain

0 **ALERT level B** = A potentially serious problem, consider carefully

5 **ALERT level C** = Check. Ensure it is not caused by an omission or oversight

7 **ALERT level G** = General information/check it is not something unexpected

**Compound L3b**

**checkCIF/PLATON (full publication check)**

---

THIS REPORT IS FOR GUIDANCE ONLY. IF USED AS PART OF A REVIEW PROCEDURE FOR PUBLICATION, IT SHOULD NOT REPLACE THE EXPERTISE OF AN EXPERIENCED CRYSTALLOGRAPHIC REFEREE.

No syntax errors found.

CIF dictionary

Please wait while processing ....

Interpreting this report

**Datablock: I**

---

Bond precision: C-C = 0.0024 Å Wavelength=0.71073

Cell: a=9.2157(5) b=8.9944(5) c=9.3471(5)

alpha=90 beta=107.344(6) gamma=90

Temperature: 293 K

|                | Calculated | Reported   |
|----------------|------------|------------|
| Volume         | 739.55(7)  | 739.55(7)  |
| Space group    | P 21/c     | P 21/c     |
| Hall group     | -P 2ybc    | -P 2ybc    |
| Moiety formula | C16 H18 N4 | C16 H18 N4 |
| Sum formula    | C16 H18 N4 | C16 H18 N4 |
| Mr             | 266.34     | 266.34     |
| Dx,g cm-3      | 1.196      | 1.196      |
| Z              | 2          | 2          |
| Mu (mm-1)      | 0.074      | 0.074      |
| F000           | 284.0      | 284.0      |
| F000'          | 284.08     |            |
| h,k,lmax       | 11,11,11   | 11,11,11   |
| Nref           | 1451       | 1448       |

Tmin,Tmax            0.982,0.985                            0.926,1.000  
Tmin'                    0.978  
Correction method= # Reported T Limits: Tmin=0.926 Tmax=1.000  
AbsCorr = MULTI-SCAN  
Data completeness= 0.998                    Theta(max)= 26.000  
R(reflections)= 0.0445( 993)                    wR2(reflections)= 0.1214( 1448)  
S = 1.042                    Npar= 91

---

The following ALERTS were generated. Each ALERT has the format

**test-name\_ALERT\_alert-type\_alert-level.**

Click on the hyperlinks for more details of the test.

---

● **Alert level G**

[PLAT005\\_ALERT\\_5\\_G](#) No `_iucr_refine_instructions_details` in the CIF    Please Do !

[PLAT199\\_ALERT\\_1\\_G](#) Reported `_cell_measurement_temperature` ..... (K)    293 Check

[PLAT200\\_ALERT\\_1\\_G](#) Reported `_diffrn_ambient_temperature` ..... (K)    293 Check

[PLAT899\\_ALERT\\_4\\_G](#) SHELXL97 is Deprecated and Succeeded by SHELXL    2014 Note

---

0 **ALERT level A** = Most likely a serious problem - resolve or explain

0 **ALERT level B** = A potentially serious problem, consider carefully

0 **ALERT level C** = Check. Ensure it is not caused by an omission or oversight

4 **ALERT level G** = General information/check it is not something unexpected
